# Supplementary material for: Activation function 1 of progesterone receptor is required for progesterone antagonism of oestrogen action in the uterus
Source: BMC Biol. 2022 Oct 5;20:222. doi: 10.1186/s12915-022-01410-3 (PMC9535881; doi:10.1186/s12915-022-01410-3)
Supplement: Supplementary file 9 — Additional file 9. 386 EB-regulated genes also regulated by progesterone compared between EB and EBP. [file 12915_2022_1410_MOESM9_ESM.xlsx]

## Sheet: Suppl.Table 7
DESEQ2 OVX WT-EB vs WT-Ctrl	external_gene_name	baseMean	log2FoldChange	lfcSE	stat	pvalue	padj		DESEQ2 OVX WT-EBP vs WT-EB	external_gene_name	baseMean	log2FoldChange	lfcSE	stat	pvalue	padj		Ensembl gene ID (counts)	RMU047	RMU048	RMU049	RMU053	RMU054	RMU055	RMU059	RMU060	RMU061	RMU050	RMU051	RMU052	RMU056	RMU057	RMU058	RMU062	RMU063	RMU064
ENSMUSG00000000531	Grasp	431.13	-0.775121	0.148556	-5.21769	1.81167e-07	1.00106e-06		ENSMUSG00000000531	Grasp	431.13	0.539214	0.154615	3.48746	0.000487625	0.0243302		ENSMUSG00000000531	681.016	753.203	650.591	394.027	325	411	247.145	257	228.008	553	580	712	344	374	356	280.993	318	350.174
ENSMUSG00000000805	Car4	97.3915	-5.7273	0.624299	-9.17397	4.55914e-20	9.30884e-19		ENSMUSG00000000805	Car4	97.3915	-2.05664	0.645777	-3.18475	0.0014488	0.047716		ENSMUSG00000000805	248	360.001	334.999	2	4	7	30	6	35	210	474.157	290	4	4	2	3	2	3
ENSMUSG00000000901	Mmp11	1139.78	-1.61484	0.330684	-4.88332	1.04316e-06	5.12013e-06		ENSMUSG00000000901	Mmp11	1139.78	1.26779	0.333149	3.80547	0.000141535	0.0104366		ENSMUSG00000000901	2142.71	2401.74	2184.07	786.001	630.001	531.1	390.37	392.045	274	1739.8	1618.07	2304.23	580.056	878.579	700.012	485.001	504.001	1012.57
ENSMUSG00000000982	Ccl3	9.3715	-1.55255	0.682186	-2.27585	0.022855	0.0462753		ENSMUSG00000000982	Ccl3	9.3715	-2.19592	0.671457	-3.27038	0.00107404	0.0400424		ENSMUSG00000000982	11	17	8	4	4	3	17.965	15	14	13	5	12	8	6	7	3	10	10
ENSMUSG00000001138	Cnnm3	774.874	-1.51535	0.203728	-7.4381	1.02141e-13	1.16335e-12		ENSMUSG00000001138	Cnnm3	774.874	-0.663733	0.205861	-3.22418	0.00126332	0.0442295		ENSMUSG00000001138	989.893	1497.76	1537.41	576.995	489.999	392.845	486.721	460.994	545.002	786.056	1351.04	1565.45	568.303	606.999	602.989	532	624	697.675
ENSMUSG00000001403	Ube2c	379.542	3.64848	0.566057	6.44542	1.15279e-10	9.36524e-10		ENSMUSG00000001403	Ube2c	379.542	2.14193	0.560906	3.81869	0.000134161	0.010026		ENSMUSG00000001403	80.989	44.308	82.981	826.705	460.177	1127.22	76	318.357	128	124.123	42	121.73	652.439	305.002	543.75	513.16	1010.27	285.804
ENSMUSG00000001473	Tubb6	2619.06	1.03711	0.134524	7.70948	1.26334e-14	1.56843e-13		ENSMUSG00000001473	Tubb6	2619.06	-0.42834	0.133541	-3.20756	0.00133868	0.0459036		ENSMUSG00000001473	1301.98	1965.18	1473.72	3024.3	3036	2846	3862.51	3773.76	3731.63	864.989	942.14	1411.77	3108.02	3459.05	3051.73	2477.76	2777.8	3656.28
ENSMUSG00000002204	Napsa	292.11	-1.08147	0.316775	-3.41399	0.000640179	0.00189218		ENSMUSG00000002204	Napsa	292.11	-1.88665	0.315462	-5.98059	2.22331e-09	1.54381e-06		ENSMUSG00000002204	311	366.99	323.92	159.001	140.999	128	851.875	333.997	448.932	276	315.173	260	130.377	174.987	215.99	185	276.698	288.997
ENSMUSG00000003153	Slc2a3	577.333	-3.28199	0.385522	-8.5131	1.69339e-17	2.74777e-16		ENSMUSG00000003153	Slc2a3	577.333	-1.52508	0.387391	-3.9368	8.25764e-05	0.0070438		ENSMUSG00000003153	519.574	1877.75	2028.95	205.367	172.431	118.372	485.34	212.218	412.944	692.622	1166.48	1412.01	189.449	229.76	203.265	177.547	152.052	290.003
ENSMUSG00000003849	Nqo1	196.802	1.17738	0.245761	4.79076	1.66149e-06	7.88245e-06		ENSMUSG00000003849	Nqo1	196.802	1.02905	0.246323	4.17763	2.94568e-05	0.00340901		ENSMUSG00000003849	154	126	124	288	286	272	123	122.965	141	145.999	87.13	129	240	255	285	220	329.002	209
ENSMUSG00000004098	Col5a3	2301.88	2.39049	0.245268	9.74645	1.91027e-22	4.75424e-21		ENSMUSG00000004098	Col5a3	2301.88	1.02149	0.244153	4.1838	2.86673e-05	0.0033792		ENSMUSG00000004098	777.803	800	588.989	3598.36	4441.65	2702.98	1348.34	2175.53	1488.15	776.356	489.435	793	4218.32	5194.68	4017.43	2931.46	2589.74	2741.76
ENSMUSG00000004110	Cacna1e	350.15	-2.09562	0.438248	-4.78181	1.7372e-06	8.212e-06		ENSMUSG00000004110	Cacna1e	350.15	-1.53981	0.440106	-3.49874	0.000467464	0.0237429		ENSMUSG00000004110	745.908	649.025	636.232	139.807	119.42	72	268.925	204.666	353.624	1191.93	660.756	809.827	94.295	205.04	109.074	115.839	87.005	120.739
ENSMUSG00000004612	Nkg7	53.7029	-2.88602	0.526092	-5.48577	4.1167e-08	2.48907e-07		ENSMUSG00000004612	Nkg7	53.7029	-1.84791	0.532997	-3.46702	0.000526254	0.0255686		ENSMUSG00000004612	148.999	73	108	22	10	11	63	50	41	135	65	87	16	14	25	19	18	44.002
ENSMUSG00000004633	Chn2	299.388	1.02328	0.187559	5.45578	4.87572e-08	2.91641e-07		ENSMUSG00000004633	Chn2	299.388	0.611978	0.186994	3.27272	0.00106517	0.0399922		ENSMUSG00000004633	158.001	219.1	233	303.001	308.001	382.999	199.84	225.999	221.001	149.973	157	217.109	373.384	314	365	395	608.241	505.123
ENSMUSG00000004885	Crabp2	1297.11	5.35967	0.411389	13.0282	8.45445e-39	6.48774e-37		ENSMUSG00000004885	Crabp2	1297.11	1.59195	0.400222	3.97766	6.9598e-05	0.00633798		ENSMUSG00000004885	85	72	52	1804.26	1913	4097	572.304	854.319	1106.78	134	39	118	2001.08	1938.27	2161.66	2040.91	2250.3	1817.19
ENSMUSG00000005873	Reep5	2952.77	1.78094	0.333648	5.33777	9.40943e-08	5.39855e-07		ENSMUSG00000005873	Reep5	2952.77	1.32153	0.333669	3.9606	7.4762e-05	0.00669843		ENSMUSG00000005873	2040.68	2588.64	2128.21	3140.57	2862	4398.24	1753.88	2285.97	2305.26	1649.07	2263.88	2305	3295.28	2986.19	2872.93	2632.16	3273.64	2997.13
ENSMUSG00000006218	Fam131c	35.2194	-2.55771	0.364554	-7.016	2.28304e-12	2.26667e-11		ENSMUSG00000006218	Fam131c	35.2194	1.84561	0.560575	3.29235	0.000993549	0.0385058		ENSMUSG00000006218	83	91.022	85.002	11	16	14	4	2	5	83	92	99	9	8	3	10	16	10
ENSMUSG00000006313	Upk1a	101.715	-1.98271	0.521814	-3.79966	0.000144898	0.000491904		ENSMUSG00000006313	Upk1a	101.715	-1.71431	0.523154	-3.27688	0.00104962	0.0397665		ENSMUSG00000006313	280	205.393	56	34	48	46	160	78	163.976	65.029	202	229	26	45	39	53	38	57
ENSMUSG00000006360	Crip1	2375.89	1.08696	0.344355	3.15651	0.0015967	0.00435328		ENSMUSG00000006360	Crip1	2375.89	1.12985	0.344463	3.28005	0.00103789	0.0395483		ENSMUSG00000006360	2556.66	1942.09	1445.75	2840.01	2200.78	6028.89	1492.65	1587.57	1898.73	1661.03	1338.97	1641.23	2843.31	2107.61	2660.95	2412.09	2927	2380.22
ENSMUSG00000006398	Cdc20	468.499	2.51394	0.484765	5.18589	2.14989e-07	1.17526e-06		ENSMUSG00000006398	Cdc20	468.499	2.23452	0.48397	4.61706	3.89214e-06	0.000690027		ENSMUSG00000006398	158	122.02	199.946	1082.62	625	1159.98	112.249	339.002	129	268	107.058	284.001	884.494	532.002	833.958	554.001	922.027	272.934
ENSMUSG00000007888	Crlf1	275.148	7.10136	0.622499	11.4078	3.82199e-30	1.68396e-28		ENSMUSG00000007888	Crlf1	275.148	-1.17458	0.307023	-3.8257	0.000130398	0.00987768		ENSMUSG00000007888	2	3	2	431	272	383.28	618.918	442.037	899.013	0	3	7	178.004	376.167	282	240	283.003	295.657
ENSMUSG00000009092	Derl3	74.1132	-2.74562	0.394846	-6.95365	3.5596e-12	3.45401e-11		ENSMUSG00000009092	Derl3	74.1132	-2.1737	0.401793	-5.41001	6.30215e-08	2.5006e-05		ENSMUSG00000009092	133.259	159	113	27	28	15	87.976	55	47.027	109.001	65	101.001	20	19	23	58.999	87	121.999
ENSMUSG00000010110	Stx5a	3029.46	-0.808287	0.106275	-7.6056	2.83576e-14	3.39794e-13		ENSMUSG00000010110	Stx5a	3029.46	-0.391681	0.106632	-3.67321	0.000239521	0.0152352		ENSMUSG00000010110	3708.15	4356.98	3870.94	2672.88	2493.69	1896.96	2758.44	2536.48	2987.98	2991.87	3508.95	4225.99	2444.3	2816.41	2577.73	2475.47	2838.56	3411.19
ENSMUSG00000012187	Mogat1	16.9751	1.99846	0.657357	3.04014	0.00236466	0.00620722		ENSMUSG00000012187	Mogat1	16.9751	2.58372	0.717176	3.60264	0.000315003	0.018291		ENSMUSG00000012187	19	5	5	18	17	32	5	3	4	12	9	12	22	19	28	24	39	14
ENSMUSG00000014905	Dnajb9	1463.05	0.461361	0.170539	2.70531	0.00682403	0.0159673		ENSMUSG00000014905	Dnajb9	1463.05	-1.17029	0.169152	-6.9186	4.56128e-12	5.42955e-09		ENSMUSG00000014905	635	1081.03	1016.96	1233.57	1310.21	682	2238.97	2249.54	2301.22	927.808	1041.08	1206.98	1136.92	1324.54	1210.98	1759.66	2085.42	2671.76
ENSMUSG00000015437	Gzmb	82.0263	-2.44893	0.525494	-4.66024	3.15847e-06	1.43522e-05		ENSMUSG00000015437	Gzmb	82.0263	-4.2046	0.520061	-8.08481	6.22614e-16	2.07517e-12		ENSMUSG00000015437	75.275	53	110	16	15	10	308.111	261	118	142	50.979	91	12	11	10	24	30	62.006
ENSMUSG00000015879	Fam184b	282.19	2.80723	0.282682	9.9307	3.06104e-23	8.11153e-22		ENSMUSG00000015879	Fam184b	282.19	-0.84573	0.256722	-3.29434	0.000986532	0.0384125		ENSMUSG00000015879	45	36.001	53	391.177	259	186	535.997	414.05	454	51	32	54	376.028	282	350	327.079	511.049	635.355
ENSMUSG00000016024	Lbp	4207.44	-1.47258	0.207891	-7.08345	1.40609e-12	1.43389e-11		ENSMUSG00000016024	Lbp	4207.44	-0.70006	0.20819	-3.36259	0.000772136	0.0330788		ENSMUSG00000016024	6187.02	6208.96	7412.52	2697	1811.36	1797	3459.58	2013.49	3739.35	9120.91	8350.07	7752.26	2376.89	1905.25	2497.08	2160.11	3146.88	3784.66
ENSMUSG00000016308	Ube2a	906.532	1.88583	0.151528	12.4454	1.48088e-35	9.18296e-34		ENSMUSG00000016308	Ube2a	906.532	0.524156	0.149677	3.50191	0.000461941	0.0237429		ENSMUSG00000016308	457.69	583.999	513.237	1118.38	1022	1147	786.883	826.988	1003.03	529	514.604	627.999	1032.11	1012.76	1014.03	952.216	1059.73	1132.63
ENSMUSG00000016918	Sulf1	1253.89	-1.14742	0.213742	-5.36824	7.95082e-08	4.60328e-07		ENSMUSG00000016918	Sulf1	1253.89	-0.786684	0.213841	-3.67882	0.000234311	0.0150914		ENSMUSG00000016918	1263.01	1672.7	1768.65	1099	1057	364	1633.46	1220.01	1366.47	1649.51	1313	2409.24	906.784	1007.67	996.084	749	786.712	1310.58
ENSMUSG00000017697	Ada	574.278	4.56529	0.321001	14.222	6.68932e-46	7.51202e-44		ENSMUSG00000017697	Ada	574.278	1.78287	0.30141	5.91508	3.31705e-09	2.04736e-06		ENSMUSG00000017697	55	40	46	1076.37	698.003	1311.11	182	391.47	290	40	45	31	986	757.005	967.433	964.027	1357.36	1113.07
ENSMUSG00000017830	Dhx58	732.069	2.35918	0.184344	12.7977	1.68806e-37	1.19573e-35		ENSMUSG00000017830	Dhx58	732.069	0.893141	0.178401	5.00637	5.54648e-07	0.000144425		ENSMUSG00000017830	214	218.999	176.054	1190.37	887.838	1091.29	497.054	585	581.149	143	140.968	170.999	1275.49	1069.26	1240.56	1102.38	1539.48	1264.2
ENSMUSG00000018217	Pmp22	2625.9	-0.698889	0.134326	-5.20292	1.96183e-07	1.07854e-06		ENSMUSG00000018217	Pmp22	2625.9	-0.559073	0.13453	-4.15575	3.24215e-05	0.00367554		ENSMUSG00000018217	2925.63	4457.54	3515.64	2071.85	2188.74	1860.99	2557.46	2395.59	3487.88	2545.62	2932.4	3759.37	2074.83	2123.97	1695.69	1908.01	2388.88	2739.74
ENSMUSG00000018339	Gpx3	6350.58	0.68272	0.271039	2.5189	0.0117722	0.0258168		ENSMUSG00000018339	Gpx3	6350.58	-1.53249	0.270772	-5.65971	1.51629e-08	7.06795e-06		ENSMUSG00000018339	3310.77	4153.57	3510.17	5154.62	5722.84	5280.48	18116.7	11282.7	14973.9	1343.01	1543.91	3178.12	3634.96	5437.69	4526.31	4785.04	5375.95	10127.6
ENSMUSG00000019139	Isyna1	8277.52	1.70504	0.277198	6.15098	7.70061e-10	5.69338e-09		ENSMUSG00000019139	Isyna1	8277.52	-1.44498	0.276735	-5.22155	1.77434e-07	5.68642e-05		ENSMUSG00000019139	1625.1	3136.9	2711.45	10206.4	6181	8508.97	27265.3	12987.6	24845.1	1415.21	2077.62	2771.99	8259.52	6860.06	9057.81	5458.74	6469.41	9957.04
ENSMUSG00000019278	Dpep1	294.487	1.60856	0.587301	2.7389	0.00616445	0.0145889		ENSMUSG00000019278	Dpep1	294.487	-1.95638	0.579454	-3.37625	0.000734816	0.0320568		ENSMUSG00000019278	47	154.015	17	152	231	195	865.839	351	927.24	38	25	92	170.003	272	140	284	314.066	1002.35
ENSMUSG00000019359	Gdpd2	209.755	3.42638	0.437395	7.83361	4.74074e-15	6.09283e-14		ENSMUSG00000019359	Gdpd2	209.755	2.28285	0.425349	5.36699	8.006e-08	2.96489e-05		ENSMUSG00000019359	16	55	35	272.999	398	373.001	21	112	75	14.999	40	49	406.998	569.997	379	439.074	249.753	380.729
ENSMUSG00000019987	Arg1	6105.33	7.74876	0.27535	28.1415	3.04594e-174	1.40242e-170		ENSMUSG00000019987	Arg1	6105.33	1.83947	0.244137	7.53458	4.89916e-14	1.36074e-10		ENSMUSG00000019987	41	60	29	8207.51	8566	8465.48	1215.29	2975.65	2456.89	30	55	48	9680.32	14453.6	12019.2	13482.4	13377.9	16113
ENSMUSG00000020083	Fam241b	75.7402	-2.0556	0.367591	-5.59209	2.24347e-08	1.40585e-07		ENSMUSG00000020083	Fam241b	75.7402	1.50094	0.423966	3.54024	0.000399767	0.0214907		ENSMUSG00000020083	206.013	158.002	135.416	34	28	49	9	15	19	143.374	208.932	138.969	35	23	30	22	35.999	34
ENSMUSG00000020111	Micu1	1503.08	1.05334	0.175064	6.01692	1.7777e-09	1.26507e-08		ENSMUSG00000020111	Micu1	1503.08	0.559506	0.174555	3.20533	0.00134909	0.0461655		ENSMUSG00000020111	899.588	1096.81	1049.12	1912.42	1908	2325.76	1137.24	1524.19	1449.94	685.998	862.001	1088	1953.26	2217.08	2001.61	1505.83	1777.01	1835.06
ENSMUSG00000020183	Cpm	574.342	-0.757206	0.177909	-4.25614	2.07987e-05	8.2129e-05		ENSMUSG00000020183	Cpm	574.342	1.30282	0.187106	6.96299	3.33119e-12	4.27033e-09		ENSMUSG00000020183	836.002	768.406	967.394	588	455.002	310.007	132.001	166	201.001	923	997.455	925.264	549	579.037	560.515	470.895	604.938	649.99
ENSMUSG00000020235	Fzr1	1235.33	0.829343	0.13637	6.08155	1.19025e-09	8.63023e-09		ENSMUSG00000020235	Fzr1	1235.33	0.488585	0.136261	3.58565	0.000336235	0.0191241		ENSMUSG00000020235	756	1247	1042.86	1608	1301	1735.58	932.953	1112.48	1077	682.763	995.28	1141	1545.92	1312.65	1448.94	1208.01	1645.44	1541.71
ENSMUSG00000020368	Canx	10355.8	1.14337	0.118185	9.67441	3.87322e-22	9.30027e-21		ENSMUSG00000020368	Canx	10355.8	-0.462017	0.117899	-3.91875	8.90106e-05	0.00737991		ENSMUSG00000020368	4651.04	6619.61	6277.11	12565.6	11248.8	8171.26	12267.1	13516.2	13522.1	5285.92	6013.32	7432.04	11158.1	11311.6	11246	11923.4	14943.7	14474.3
ENSMUSG00000020419	Hormad2	13.2833	4.84677	0.948484	5.11002	3.22133e-07	1.7107e-06		ENSMUSG00000020419	Hormad2	13.2833	1.88901	0.545209	3.46475	0.000530717	0.0257105		ENSMUSG00000020419	1	1	1	32	19	39	4	9	10	0	0	1	22	29	31	13	13	14
ENSMUSG00000020467	Efemp1	1613.32	-3.43649	0.325362	-10.5621	4.46763e-26	1.47456e-24		ENSMUSG00000020467	Efemp1	1613.32	-1.14302	0.326465	-3.5012	0.000463165	0.0237429		ENSMUSG00000020467	3777	3469.34	4118.46	485	353	221	1072.81	341.979	864.006	3732.39	3659.33	4122.52	353	270.176	345	306	432	773.422
ENSMUSG00000020690	Efcab3	27.286	1.39096	0.605413	2.29754	0.0215878	0.0439706		ENSMUSG00000020690	Efcab3	27.286	-1.91314	0.554659	-3.44922	0.000562218	0.0267696		ENSMUSG00000020690	12.521	11.208	6.478	13.217	25.294	22.613	58.531	28.096	132.175	4.549	5.389	11.544	17.62	12.362	17.158	16.542	25.335	23.736
ENSMUSG00000020808	Pimreg	124.087	2.20057	0.55052	3.99725	6.40835e-05	0.000232191		ENSMUSG00000020808	Pimreg	124.087	1.74277	0.549177	3.17342	0.00150657	0.0490721		ENSMUSG00000020808	80	24	57	257.001	191.999	232	43.04	95	54	88	15	79	172	182.065	208.001	164	199.995	76.89
ENSMUSG00000020899	Pfas	900.057	-0.5326	0.134841	-3.94982	7.82084e-05	0.000279574		ENSMUSG00000020899	Pfas	900.057	-0.569462	0.135037	-4.21707	2.47492e-05	0.00305516		ENSMUSG00000020899	770.085	1220.65	1106.41	915.489	731.925	509.313	842.254	980.991	999.401	993.441	984.639	1237	849.809	689.954	828.734	740.275	988.43	914.38
ENSMUSG00000020905	Usp43	561.525	3.172	0.226616	13.9973	1.62003e-44	1.65757e-42		ENSMUSG00000020905	Usp43	561.525	0.76789	0.216092	3.55354	0.000380087	0.020836		ENSMUSG00000020905	109	108	127	1118	690	828	483.01	443.999	546.984	107.999	125.911	164.129	1087.4	694	902.074	717.642	895.383	724.749
ENSMUSG00000020911	Krt19	19518.4	1.74788	0.307972	5.67547	1.3831e-08	8.87547e-08		ENSMUSG00000020911	Krt19	19518.4	1.1197	0.307932	3.63619	0.000276705	0.0164689		ENSMUSG00000020911	9060.6	8923.55	7958.68	23430.1	20955.9	33926.8	8136.47	17552.8	11882.2	7154.61	11431.5	7801.26	30954.4	21790	28404.1	28597.6	38508.8	34687.9
ENSMUSG00000020964	Sel1l	3749.09	0.535184	0.120867	4.42788	9.51643e-06	3.98056e-05		ENSMUSG00000020964	Sel1l	3749.09	-0.534645	0.120329	-4.44318	8.8638e-06	0.00140681		ENSMUSG00000020964	1707.19	3446.71	2677.51	3948.35	3614.33	2426.94	4242.76	4951.43	4709.02	2223.05	3004.26	3518.05	3996.86	4102.35	4069.78	4422.54	5058.13	5562.83
ENSMUSG00000021097	Clmn	1052.77	-3.29747	0.204665	-16.1115	2.11776e-58	4.38234e-56		ENSMUSG00000021097	Clmn	1052.77	-0.835568	0.209263	-3.9929	6.52691e-05	0.00604283		ENSMUSG00000021097	2221.25	2718.35	2814.6	242	162.999	131.001	332	288	332	3367.71	3404.36	3127.78	195.007	214.021	215.014	316.01	510.091	610.792
ENSMUSG00000021125	Arg2	210.649	-1.30559	0.365946	-3.56773	0.000360093	0.00112984		ENSMUSG00000021125	Arg2	210.649	-1.49172	0.366031	-4.07541	4.59343e-05	0.00478434		ENSMUSG00000021125	260.001	251.14	446.606	119	112	125	341.156	136	469.233	262	263.471	434	75.002	86	113.017	62	104	134.165
ENSMUSG00000021211	Akr1c12	79.7946	0.872874	0.310224	2.81369	0.0048977	0.0119109		ENSMUSG00000021211	Akr1c12	79.7946	1.19563	0.317223	3.76903	0.000163882	0.0115236		ENSMUSG00000021211	87.128	83.919	47.952	116.919	82.344	169.345	37.897	53.377	60.014	58.646	49.111	69.377	95.111	84.861	97.917	67.635	84.406	91.728
ENSMUSG00000021238	Aldh6a1	1788.4	-1.79214	0.267136	-6.7087	1.96362e-11	1.74368e-10		ENSMUSG00000021238	Aldh6a1	1788.4	-0.878394	0.267626	-3.28217	0.00103011	0.0394639		ENSMUSG00000021238	2420.54	4151.12	3197.98	1154.35	984	410	1717.92	1128.59	1479	2829.57	3205.52	3289.8	944.165	1180.06	1031.37	915.332	1178.84	1657.45
ENSMUSG00000021253	Tgfb3	834.11	0.417807	0.172225	2.42594	0.0152689	0.0324121		ENSMUSG00000021253	Tgfb3	834.11	0.621265	0.172968	3.59179	0.000328408	0.0189205		ENSMUSG00000021253	662	1018.34	898.466	1071.86	1178	913	526.299	623	802	577	645.054	1037	964.203	1292.38	1091	571	567.659	681.04
ENSMUSG00000021263	Degs2	166.643	-1.36429	0.397315	-3.43377	0.00059525	0.00177218		ENSMUSG00000021263	Degs2	166.643	-1.59931	0.397167	-4.0268	5.65404e-05	0.0056086		ENSMUSG00000021263	249	253.144	256	69	48.001	146	318.735	121	354	238	252.271	284.004	65	71	70	50	54	57
ENSMUSG00000021303	Gng4	584.631	5.04729	0.308321	16.3702	3.11989e-60	7.18237e-58		ENSMUSG00000021303	Gng4	584.631	1.81406	0.28914	6.27399	3.5191e-10	2.79266e-07		ENSMUSG00000021303	47	38	45.914	761.573	690.028	660.999	90.029	282.369	141	23	24	47	702.77	1134.71	963.054	711.148	990.112	952.092
ENSMUSG00000021396	Nxnl2	110.774	1.21177	0.307238	3.94409	8.01033e-05	0.000285959		ENSMUSG00000021396	Nxnl2	110.774	1.35004	0.310606	4.34648	1.38339e-05	0.00195374		ENSMUSG00000021396	75	73.001	98.362	160	143	205	59	79	59.001	69	57.905	100.051	142.027	168	135.878	96.319	99.049	161.187
ENSMUSG00000021413	Prpf4b	4949.66	-0.714286	0.0838425	-8.51938	1.60415e-17	2.61217e-16		ENSMUSG00000021413	Prpf4b	4949.66	-0.293573	0.0839957	-3.4951	0.000473889	0.0238591		ENSMUSG00000021413	4826.42	6820.72	5652.08	4726.49	4260.21	1909.9	4230.68	4735.99	5056.54	6148.55	6344.13	6631.62	4430.51	4392.64	4404.94	4447.18	5590.51	5804.27
ENSMUSG00000021460	Auh	715.424	-0.364851	0.15161	-2.4065	0.0161061	0.0340089		ENSMUSG00000021460	Auh	715.424	0.617228	0.15442	3.99706	6.41331e-05	0.0060383		ENSMUSG00000021460	864.14	1047.76	1012.62	666.014	706.004	660.409	447.84	384.788	491.004	711.617	954.013	1049.98	609.914	794.22	750.316	551.64	599.25	652.653
ENSMUSG00000021474	Sfxn1	1456.83	0.925686	0.144882	6.38924	1.6671e-10	1.33028e-09		ENSMUSG00000021474	Sfxn1	1456.83	-0.528908	0.14334	-3.68988	0.000224364	0.0146056		ENSMUSG00000021474	872.007	997.034	821.002	1830.32	1383	1420	2066.54	1687.69	2525.96	857.997	859.955	972.944	1731.16	1503.67	1755.97	1235	1788.84	1598.07
ENSMUSG00000021519	Mterf3	892.668	-0.82014	0.149894	-5.47145	4.4637e-08	2.68478e-07		ENSMUSG00000021519	Mterf3	892.668	-0.493651	0.15078	-3.27399	0.00106042	0.0399817		ENSMUSG00000021519	1052	1236.12	1190.77	812.378	733.718	477.172	761.594	756.411	885.45	1124.11	1104.43	1213.86	774.126	725.115	833.487	665.62	787.475	863.143
ENSMUSG00000021943	Gdf10	1433.23	-1.68079	0.240105	-7.00024	2.5552e-12	2.52598e-11		ENSMUSG00000021943	Gdf10	1433.23	-1.25154	0.240448	-5.20501	1.93986e-07	6.09956e-05		ENSMUSG00000021943	1484.13	2941.3	2646.51	780	695	529.09	1803.09	1195.24	1438.33	2065.84	2541.93	3589.89	772.585	569.98	852.036	560.318	673.176	1056.42
ENSMUSG00000022021	Diaph3	141.149	1.13576	0.450568	2.52073	0.0117111	0.0256889		ENSMUSG00000022021	Diaph3	141.149	1.43431	0.445515	3.21945	0.00128438	0.0448724		ENSMUSG00000022021	54.001	44	64	270.057	200.389	147.001	50	148	63.182	96	61	71	293.4	202	225	206	356.011	123
ENSMUSG00000022032	Scara5	477.06	-3.01256	0.387514	-7.77405	7.60139e-15	9.63488e-14		ENSMUSG00000022032	Scara5	477.06	-2.20906	0.388504	-5.68607	1.29995e-08	6.56477e-06		ENSMUSG00000022032	591.463	1041.93	1133.91	146.007	111	62	712.51	220	406.001	642.002	936.636	1426.11	151.006	116.079	110	201	298.098	489.144
ENSMUSG00000022098	Bmp1	4687.48	0.750416	0.161268	4.65321	3.26813e-06	1.48212e-05		ENSMUSG00000022098	Bmp1	4687.48	-0.547576	0.160916	-3.40287	0.000666819	0.0301153		ENSMUSG00000022098	2272.35	4217.3	3257.98	5420.24	4911.61	3790.09	6608.11	5946.98	6941.19	2291.01	2417.05	4029.76	5089.15	5323.17	4941.6	4642.48	5157.93	6532.44
ENSMUSG00000022126	Acod1	39.8061	-3.36441	0.832836	-4.0397	5.35189e-05	0.000196346		ENSMUSG00000022126	Acod1	39.8061	-4.38102	0.829657	-5.28052	1.2882e-07	4.3812e-05		ENSMUSG00000022126	49	78.97	42	7	5	3	136	7	148	65	93	31	3	4	13	5	5	4
ENSMUSG00000022136	Dnajc3	4705.46	1.12171	0.115365	9.72312	2.40307e-22	5.92467e-21		ENSMUSG00000022136	Dnajc3	4705.46	-0.754655	0.114456	-6.59338	4.29919e-11	3.98034e-08		ENSMUSG00000022136	1915.92	2476.2	2421.96	5268.05	4810.72	3248.49	6736.16	7116.94	7067.62	2370.72	2367.34	2966.61	4645.38	4432.41	4782.74	6054.2	7132.6	7880.13
ENSMUSG00000022219	Cideb	62.2911	3.94393	0.500032	7.88735	3.08661e-15	4.05175e-14		ENSMUSG00000022219	Cideb	62.2911	1.46361	0.419886	3.48574	0.000490783	0.024342		ENSMUSG00000022219	11	4	8	113	74	159	36.058	22	66	8	3	4	100	101	106	74.001	120.028	147.946
ENSMUSG00000022324	Matn2	3031.64	-1.00261	0.259462	-3.86416	0.00011147	0.000385819		ENSMUSG00000022324	Matn2	3031.64	-1.40131	0.259416	-5.40178	6.59839e-08	2.55726e-05		ENSMUSG00000022324	3542.68	3527.04	3808.69	1728.38	2222	1116.52	4730.75	3180.86	4538.72	3583.03	2893.35	5359.79	1652.77	2379.78	1724.03	2081.58	2426.44	4157.98
ENSMUSG00000022433	Csnk1e	2993.82	0.223218	0.0818108	2.72847	0.00636294	0.0150057		ENSMUSG00000022433	Csnk1e	2993.82	0.292414	0.0821969	3.55749	0.000374416	0.0206611		ENSMUSG00000022433	2399.44	3043.21	3037.72	3166.52	2841.18	2930.24	2000.93	2306.27	2415.28	2416.13	3071.53	3264.62	3367.98	3361.29	3322.11	3215.57	3958.5	4075.91
ENSMUSG00000022498	Txndc11	1322.54	0.948568	0.158457	5.9863	2.14673e-09	1.5148e-08		ENSMUSG00000022498	Txndc11	1322.54	-0.677204	0.156553	-4.32573	1.5203e-05	0.00211132		ENSMUSG00000022498	474.993	897.76	837.965	1424.01	1280.37	1143.83	1899.94	1862.76	2085.58	583.393	769.025	888.259	1395.73	1437.39	1418.3	1551.54	1785.86	2017.81
ENSMUSG00000022704	Qtrt2	820.579	-1.30441	0.219596	-5.94006	2.84926e-09	1.97869e-08		ENSMUSG00000022704	Qtrt2	820.579	-0.80395	0.220562	-3.645	0.000267388	0.0162037		ENSMUSG00000022704	1083.8	1419.92	1300.05	599.001	510	384	740.613	629.002	770.001	1247.99	1323.51	1460.99	517.073	510.001	594.999	488.98	667.743	637.527
ENSMUSG00000022783	Spag6l	7.70039	1.85741	0.712641	2.60638	0.00915061	0.0207418		ENSMUSG00000022783	Spag6l	7.70039	3.66977	1.00378	3.65594	0.000256245	0.0157794		ENSMUSG00000022783	4	5	2	14	17	11	0	2	1	9	5	5	10	23	18	5	8	6
ENSMUSG00000022938	Fam3b	450.03	7.57573	0.481269	15.7412	7.89915e-56	1.41283e-53		ENSMUSG00000022938	Fam3b	450.03	1.09761	0.271051	4.04945	5.13384e-05	0.00518352		ENSMUSG00000022938	5	8	0	884.329	718	1145	283.687	374.826	566.444	3	9	1	869.697	852.539	951.802	568.158	711.014	671.062
ENSMUSG00000023224	Serping1	4873.46	-1.64101	0.273653	-5.99667	2.01407e-09	1.42666e-08		ENSMUSG00000023224	Serping1	4873.46	-0.927114	0.273789	-3.38623	0.000708598	0.0310945		ENSMUSG00000023224	10507.6	8151.69	6865.94	3044.02	2760	1843.67	5328.73	3421.53	4613.31	7605.43	4705.34	7588.11	2971.1	3757.74	3015.36	3187.89	3235.7	5661.72
ENSMUSG00000023345	Poc1a	119.771	1.61433	0.424263	3.80502	0.000141795	0.000482082		ENSMUSG00000023345	Poc1a	119.771	1.4686	0.424128	3.46263	0.000534925	0.0258392		ENSMUSG00000023345	54	96.001	92.036	166.999	127.001	183	66.978	110.048	59	86	73.001	74	181	110.999	157	114	183	101.001
ENSMUSG00000023456	Tpi1	10542.5	1.53157	0.179887	8.51406	1.67944e-17	2.72754e-16		ENSMUSG00000023456	Tpi1	10542.5	0.607978	0.179752	3.38232	0.000718756	0.0314385		ENSMUSG00000023456	5420.39	5907.51	5460.58	14419.6	12161.3	17918.6	7464.49	10522.5	9586.46	3725.22	5688.93	5841.56	14723.6	12772.6	14230.8	12362.1	15118.3	15986.2
ENSMUSG00000023505	Cdca3	440.278	2.81763	0.546716	5.15374	2.55346e-07	1.38031e-06		ENSMUSG00000023505	Cdca3	440.278	2.1399	0.545104	3.92567	8.64885e-05	0.00724286		ENSMUSG00000023505	222	76	107	962.015	556	1087.99	95	372.329	163	173.215	58	176	768.018	427.335	710	551.365	830.999	241.152
ENSMUSG00000023755	Rhebl1	263.875	-2.57204	0.220054	-11.6882	1.46419e-31	6.95e-30		ENSMUSG00000023755	Rhebl1	263.875	0.810607	0.245321	3.30427	0.000952255	0.0376944		ENSMUSG00000023755	737.002	730.13	663.216	99.072	94	131.001	58.98	44	60	467.652	529.317	713.225	70	109.133	112	76	84.999	99.001
ENSMUSG00000023885	Thbs2	1174.35	1.2857	0.433283	2.96736	0.00300372	0.00770144		ENSMUSG00000023885	Thbs2	1174.35	1.86506	0.434013	4.29726	1.72926e-05	0.00232662		ENSMUSG00000023885	586.345	1070.01	832.999	1343.98	3381	784	414.034	586.971	391	824	481.928	1171.05	1572.41	3085.03	1398.14	1317.74	846.013	1292.9
ENSMUSG00000023942	Slc29a1	1882.45	-2.76265	0.171369	-16.121	1.81576e-58	3.80009e-56		ENSMUSG00000023942	Slc29a1	1882.45	-0.589926	0.173166	-3.40671	0.000657514	0.0298569		ENSMUSG00000023942	4019.57	5454.53	4791.86	681.055	656.002	663	1107.92	664.999	941.191	3038.48	3437.96	4355.14	682.454	681.002	593.999	645.486	1000.8	870.048
ENSMUSG00000024014	Pim1	1685.02	0.878987	0.130237	6.74912	1.48749e-11	1.33961e-10		ENSMUSG00000024014	Pim1	1685.02	0.655934	0.129577	5.06212	4.14619e-07	0.000113273		ENSMUSG00000024014	990.992	1184.27	1172.24	2904.37	2235	2836.74	1261.52	1493.62	1855.51	750.998	1054.74	1112	2209.43	2503.37	2431.67	1695.31	1820.11	1970.82
ENSMUSG00000024424	Ttc39c	563.79	1.64122	0.221373	7.41382	1.22715e-13	1.38229e-12		ENSMUSG00000024424	Ttc39c	563.79	1.07461	0.219075	4.90524	9.33114e-07	0.00021014		ENSMUSG00000024424	225.148	327.002	275.358	747.64	804.998	975.069	364.11	492.001	509.999	171.001	305	327.999	739.846	1018.54	762.962	664.134	682.195	730.449
ENSMUSG00000024556	Me2	1109.82	1.40194	0.220413	6.36051	2.01079e-10	1.58939e-09		ENSMUSG00000024556	Me2	1109.82	0.881732	0.220041	4.00712	6.14644e-05	0.0059016		ENSMUSG00000024556	665.412	567.396	564.947	1641	1281.36	1254.78	530.783	838.159	749	797.548	740.994	784.529	1778.71	1373.21	1637.4	1289.47	2009.2	1343.58
ENSMUSG00000024640	Psat1	1298.23	1.17265	0.295226	3.97204	7.12595e-05	0.000256375		ENSMUSG00000024640	Psat1	1298.23	1.05928	0.295238	3.58788	0.000333371	0.0190261		ENSMUSG00000024640	1150.5	836	732.171	1938.21	1664.55	2075	586.073	1169.96	964.075	1074.44	828.956	993.816	1780.98	1392.32	1657.5	1295.53	1727.72	1246.67
ENSMUSG00000024678	Ms4a4d	435.447	-0.890319	0.305004	-2.91904	0.00351107	0.00885314		ENSMUSG00000024678	Ms4a4d	435.447	-1.26286	0.304842	-4.14266	3.43306e-05	0.00383972		ENSMUSG00000024678	747.011	358	449.012	300	270	205	579.521	534.343	623.142	552.274	370.212	496	306.051	311.032	285	325.04	395.203	694.392
ENSMUSG00000024885	Aldh3b1	141.051	0.496991	0.194314	2.55767	0.0105377	0.0234331		ENSMUSG00000024885	Aldh3b1	141.051	0.703286	0.198479	3.54339	0.000395023	0.0213735		ENSMUSG00000024885	129	165.538	103	168	160	180.932	100	85	117	85	102.036	100	160	151	180.232	148	207.116	213.83
ENSMUSG00000024935	Slc1a1	1690.74	-1.95229	0.266661	-7.32125	2.45663e-13	2.68828e-12		ENSMUSG00000024935	Slc1a1	1690.74	-1.092	0.26723	-4.08637	4.38181e-05	0.00468017		ENSMUSG00000024935	3183.53	2734.01	2293.78	815.094	512	533.078	1177	1047	1545.93	3546.33	5176.67	2747.53	683.123	618.095	735	916.001	1489.43	1206.66
ENSMUSG00000025025	Mxi1	1125.65	-1.40218	0.158069	-8.87071	7.26836e-19	1.32861e-17		ENSMUSG00000025025	Mxi1	1125.65	0.591654	0.162092	3.65012	0.000262121	0.0160555		ENSMUSG00000025025	1655.07	2159.54	2211.9	752	765	605.001	456.981	413.211	397.624	1585.59	2223.26	2109.76	787.141	839.604	912.999	791.669	856.831	1248.85
ENSMUSG00000025082	Vwa2	641.439	-5.31175	0.342852	-15.4929	3.87708e-54	6.49129e-52		ENSMUSG00000025082	Vwa2	641.439	-1.85036	0.34996	-5.28734	1.24106e-07	4.30881e-05		ENSMUSG00000025082	1657.05	1333.25	1805.43	39	42	33	182.168	64	141.03	2067.95	1789.23	2111.67	35	51	31	73	125	72.001
ENSMUSG00000025236	Adpgk	1048.96	0.567803	0.0822882	6.90018	5.19385e-12	4.94853e-11		ENSMUSG00000025236	Adpgk	1048.96	-0.309393	0.0802582	-3.85496	0.000115747	0.00901363		ENSMUSG00000025236	625.464	930.929	781.839	1210	1025.8	776.095	1153.27	1144.65	1346	657.111	723.57	833.435	1176.45	1349.37	1234.02	1086.01	1484.21	1365.66
ENSMUSG00000025283	Sat1	9094.36	1.55861	0.226997	6.86621	6.59318e-12	6.18262e-11		ENSMUSG00000025283	Sat1	9094.36	0.941408	0.226931	4.14843	3.34759e-05	0.00376943		ENSMUSG00000025283	5934.45	5294.01	4505.47	11325.7	11317	18294.7	5445.05	7012.3	8239.62	3802.41	4720.56	4587.88	9661.39	12746.3	11171.5	11195.1	12127.3	14645.7
ENSMUSG00000025407	Gli1	2237.66	-3.69287	0.248579	-14.8559	6.37162e-50	8.75717e-48		ENSMUSG00000025407	Gli1	2237.66	-0.906994	0.250315	-3.62341	0.000290744	0.017121		ENSMUSG00000025407	4599.24	6205.77	6683.82	432	495.999	283	796.454	552.226	777	5811.18	4292.54	8040.79	412.895	513.011	346.997	358	502.221	382.147
ENSMUSG00000025432	Avil	877.278	4.18547	0.237288	17.6388	1.24143e-69	4.76322e-67		ENSMUSG00000025432	Avil	877.278	0.953268	0.222169	4.29073	1.78087e-05	0.00233687		ENSMUSG00000025432	69	112	84	1289.78	1387.42	1613.01	452.129	782.609	802.023	69	101.027	65	1536.06	1455.31	1491.95	1262	1587.99	1245.78
ENSMUSG00000025498	Irf7	1407.56	1.69269	0.176668	9.58122	9.59031e-22	2.2273e-20		ENSMUSG00000025498	Irf7	1407.56	0.765615	0.175345	4.36633	1.26353e-05	0.00181524		ENSMUSG00000025498	487.999	692.181	687.838	1906.23	1516.87	1876	1108.01	934.311	1083.02	353	599.004	586.01	2199.48	1963.02	2078.65	1935.08	3076.25	2533.66
ENSMUSG00000025646	Atrip	538.995	-0.657271	0.100695	-6.52732	6.69555e-11	5.59213e-10		ENSMUSG00000025646	Atrip	538.995	-0.416931	0.103149	-4.04202	5.29919e-05	0.00528809		ENSMUSG00000025646	724.388	841.224	821.183	450.387	400.23	304.729	488.805	514.7	510.177	646.677	708.194	855.478	410.341	542.12	413.447	383.078	455.275	504.202
ENSMUSG00000025784	Clec3b	250.646	-4.45566	0.482072	-9.24273	2.40283e-20	5.01734e-19		ENSMUSG00000025784	Clec3b	250.646	-1.6426	0.488307	-3.36386	0.000768595	0.0330119		ENSMUSG00000025784	603.853	1251.34	562.651	21	21	53	127.652	42	130	282	476.162	852.05	30	25	22	33	70.391	72
ENSMUSG00000025823	Pdia4	6327.62	1.33543	0.102581	13.0183	9.63062e-39	7.29906e-37		ENSMUSG00000025823	Pdia4	6327.62	-0.679818	0.101676	-6.68611	2.29188e-11	2.24672e-08		ENSMUSG00000025823	2378.64	2920.32	2821.58	7200.65	6046.72	5765.51	9095.32	9711.01	9590.78	2356.77	2643.11	3539.67	6704.77	5873.67	6090.9	8765.81	11043.5	10415.7
ENSMUSG00000026003	Acadl	1777.38	0.542204	0.129404	4.19001	2.78943e-05	0.000107497		ENSMUSG00000026003	Acadl	1777.38	0.437286	0.129578	3.3747	0.000738969	0.0321538		ENSMUSG00000026003	1556.96	1704.62	1571.84	1986.2	1939	2324.08	1331.92	1454.65	1588.92	1580.42	1636.25	1760	1976.04	2058.19	1974.02	1482.64	2013.1	2009.22
ENSMUSG00000026358	Rgs1	125.167	-2.93461	0.324839	-9.03406	1.65411e-19	3.19662e-18		ENSMUSG00000026358	Rgs1	125.167	-1.22408	0.336484	-3.63786	0.000274915	0.0164472		ENSMUSG00000026358	254.999	316.999	361.067	50	45.999	27	74	55	82.045	136	193.996	352.431	46.001	61	50	55	40.999	95
ENSMUSG00000026405	C4bp	108.962	3.46939	0.56577	6.13216	8.66934e-10	6.3687e-09		ENSMUSG00000026405	C4bp	108.962	2.56645	0.557941	4.59987	4.22751e-06	0.000741595		ENSMUSG00000026405	18	7	32	168.002	161	259	22	30	31	32	10	37	110	337.97	163	194.017	218.24	191
ENSMUSG00000026573	Xcl1	44.0615	-2.3519	0.536651	-4.38255	1.17299e-05	4.84806e-05		ENSMUSG00000026573	Xcl1	44.0615	-3.02424	0.534125	-5.66204	1.49581e-08	7.06795e-06		ENSMUSG00000026573	77.577	36	91	10	10	18	110	112	63	63	36	42	9	6	20	17	16	26
ENSMUSG00000026622	Nek2	224.593	2.7064	0.514352	5.26176	1.42683e-07	8.00178e-07		ENSMUSG00000026622	Nek2	224.593	1.91101	0.508781	3.75604	0.00017262	0.0119477		ENSMUSG00000026622	74	49	64	601.007	293	502.791	54	234	71.079	78	50	87	434	228.042	357	310.052	458	136.278
ENSMUSG00000026688	Mgst3	708.442	1.37177	0.302042	4.54166	5.58135e-06	2.43294e-05		ENSMUSG00000026688	Mgst3	708.442	0.961425	0.301719	3.18649	0.0014401	0.0476707		ENSMUSG00000026688	540	491.198	346.911	839.918	748	1640	364.632	592	650.011	306.656	378	380	858.018	806.623	783	886	1125.51	915.045
ENSMUSG00000026864	Hspa5	25827.8	1.61477	0.169838	9.50769	1.94944e-21	4.41067e-20		ENSMUSG00000026864	Hspa5	25827.8	-0.655303	0.169683	-3.86193	0.000112493	0.0088429		ENSMUSG00000026864	7385.98	11103.5	11340.7	27924.2	26474.7	27010.8	36060.6	39807.3	40364.1	6459.37	8678.73	14437.6	25807.2	24169.3	25143.8	36821.4	44992.8	42054.9
ENSMUSG00000026888	Grb14	151.243	-2.04845	0.293012	-6.99101	2.72915e-12	2.68497e-11		ENSMUSG00000026888	Grb14	151.243	1.00218	0.314378	3.18781	0.00143356	0.0476707		ENSMUSG00000026888	232.019	384	357.001	72.999	70	71	42.001	47	48	220	352.243	356	98	65	88	65	71	65.868
ENSMUSG00000027070	Lrp2	644.797	-3.17478	0.508441	-6.24415	4.26112e-10	3.24017e-09		ENSMUSG00000027070	Lrp2	644.797	-3.65119	0.508317	-7.1829	6.82462e-13	1.26369e-09		ENSMUSG00000027070	681	1863.26	563.49	159	64	50	1143.09	902.724	1586.9	2226.75	1287.2	585.829	88.004	46	67	65	108	238
ENSMUSG00000027086	Fastkd1	349.267	-1.2897	0.183227	-7.03883	1.93855e-12	1.93823e-11		ENSMUSG00000027086	Fastkd1	349.267	-0.594749	0.186301	-3.19241	0.0014109	0.0472141		ENSMUSG00000027086	485.613	665.369	599.307	271.044	231.041	145.069	318.08	239.554	334.885	485.397	577.176	603.402	228.673	231.03	205.346	203.995	256.275	317
ENSMUSG00000027330	Cdc25b	1107.09	-0.998341	0.199372	-5.00742	5.51635e-07	2.82443e-06		ENSMUSG00000027330	Cdc25b	1107.09	0.715352	0.202119	3.53926	0.000401256	0.0215014		ENSMUSG00000027330	1707.75	2103.02	1722.69	1025.71	863.001	919	401.467	516.349	496.998	1524.18	1619.4	1931	1031.01	850.02	836	817	1050.05	654.28
ENSMUSG00000027331	Knstrn	404.471	2.13925	0.423868	5.04699	4.48836e-07	2.33575e-06		ENSMUSG00000027331	Knstrn	404.471	1.77194	0.423626	4.1828	2.87937e-05	0.0033792		ENSMUSG00000027331	259.001	152.087	182.006	745.848	499	904.006	136.999	290.991	224.304	247	121.024	231	625.263	415.004	610.103	446	650.552	281.001
ENSMUSG00000027597	Ahcy	3398.92	1.30459	0.150407	8.67373	4.18206e-18	7.10526e-17		ENSMUSG00000027597	Ahcy	3398.92	0.482714	0.149991	3.2183	0.00128955	0.0449588		ENSMUSG00000027597	1795.86	2194.05	1990.73	4654.36	4814.66	4280.54	2538.3	3854.26	2851.37	1232.91	1558.81	2105.78	4545.43	5327.04	4706.67	3733.43	4198.13	4881.74
ENSMUSG00000027610	Gss	1154.03	2.17224	0.263824	8.23369	1.81539e-16	2.6535e-15		ENSMUSG00000027610	Gss	1154.03	0.897723	0.262195	3.42388	0.00061734	0.0287373		ENSMUSG00000027610	479.001	403	398.306	1461.42	1312	2364	833.021	942.18	985.969	290.999	438.092	452	1654.23	1375.81	1650.3	1470.49	2203.04	1807.61
ENSMUSG00000027808	Serp1	6153.71	1.92424	0.101977	18.8693	2.04008e-79	1.21201e-76		ENSMUSG00000027808	Serp1	6153.71	-0.517199	0.10069	-5.13655	2.79821e-07	8.47858e-05		ENSMUSG00000027808	1559.83	2494.01	2261.52	7997.74	6952.35	5898.45	9275.67	8228.47	10534.8	2043.62	2170.34	2569.26	6824.59	7148.99	7111.26	7448.49	8856.55	9006
ENSMUSG00000027820	Mme	2033.85	-2.1266	0.3129	-6.79642	1.07248e-11	9.84146e-11		ENSMUSG00000027820	Mme	2033.85	-1.57275	0.313216	-5.02128	5.13271e-07	0.000135772		ENSMUSG00000027820	4477.86	3824.66	3611.13	815.16	878	417	1849.06	1139.95	2723.89	5961.43	4262.69	3980.71	707.177	896.642	781.999	788.621	1146.64	1225.33
ENSMUSG00000027822	Slc33a1	1079.04	0.905401	0.0996402	9.08671	1.02086e-19	2.01945e-18		ENSMUSG00000027822	Slc33a1	1079.04	-0.460387	0.0966245	-4.7647	1.89135e-06	0.00036229		ENSMUSG00000027822	587.215	705.999	635.475	1254.82	1106.02	896.33	1391.71	1328.89	1494.35	688.581	656.407	674.547	1116.63	1245.84	1219.99	1203.7	1453.64	1600.26
ENSMUSG00000027831	Veph1	74.3064	-3.27099	0.425913	-7.67997	1.59129e-14	1.95378e-13		ENSMUSG00000027831	Veph1	74.3064	-1.83769	0.439546	-4.18087	2.90392e-05	0.00338419		ENSMUSG00000027831	186.203	156.576	219.995	20.583	10.711	11.005	43.003	41.1	53.068	243.767	130.217	202.36	10.908	8.806	27.59	20.039	26.187	35.435
ENSMUSG00000027896	Slc16a4	183.682	1.17528	0.317495	3.70174	0.000214128	0.000702456		ENSMUSG00000027896	Slc16a4	183.682	1.06953	0.318542	3.35757	0.000786301	0.0333428		ENSMUSG00000027896	119.021	100.001	111	245	298	148	59	127	117.001	115	92	124	269.999	366	217.999	311.999	257.739	234.024
ENSMUSG00000027984	Hadh	1339.04	-0.837847	0.171383	-4.88874	1.01484e-06	4.99876e-06		ENSMUSG00000027984	Hadh	1339.04	0.606686	0.173335	3.50007	0.000465134	0.0237429		ENSMUSG00000027984	2214.59	2438.6	1932.05	1115.7	902.065	1348.69	708.35	638.014	760.134	1911.24	2014.65	2282.7	1024.36	972.758	1098.94	800.37	1117.92	1074.7
ENSMUSG00000027994	Mcub	175.51	1.31354	0.254298	5.16538	2.39945e-07	1.30164e-06		ENSMUSG00000027994	Mcub	175.51	1.02019	0.254477	4.00898	6.09805e-05	0.0059016		ENSMUSG00000027994	106	120.191	95	195	197	304.001	93	104	123	75	112	93	212.202	185	237.053	232	390.99	295.989
ENSMUSG00000027996	Sfrp2	754.547	-1.58246	0.458053	-3.45476	0.00055079	0.00165237		ENSMUSG00000027996	Sfrp2	754.547	1.59799	0.463525	3.44748	0.000565842	0.0268654		ENSMUSG00000027996	934.236	1724.44	1934.26	266	669	432	102	136	137.713	1562.86	1597.01	2215.45	454.103	798.728	273	466	286.279	132
ENSMUSG00000028019	Pdgfc	1269.2	-0.626975	0.127309	-4.92483	8.44333e-07	4.20273e-06		ENSMUSG00000028019	Pdgfc	1269.2	0.533667	0.129707	4.11441	3.88179e-05	0.00423594		ENSMUSG00000028019	1634	1940.67	1731.38	1101.71	1236.39	846.846	606.5	666.687	798.155	1575.01	1560.48	2053.99	1198.98	1414	1181.86	1083.38	1379.87	1188.01
ENSMUSG00000028150	Rorc	748.793	-4.65268	0.323409	-14.3863	6.30505e-47	7.30316e-45		ENSMUSG00000028150	Rorc	748.793	-1.146	0.329578	-3.47717	0.000506729	0.0249104		ENSMUSG00000028150	1325.15	2783.04	2330.11	90	63.001	79	191.588	128	154.001	963.944	2901.82	2043.03	95	83	93	180	229.026	305.621
ENSMUSG00000028167	Bdh2	346.451	-3.22296	0.224009	-14.3876	6.18809e-47	7.21305e-45		ENSMUSG00000028167	Bdh2	346.451	0.991942	0.251197	3.94886	7.85256e-05	0.00685146		ENSMUSG00000028167	1186.61	881.61	941.468	116	85	93	56	43	54	821.027	691.055	982.796	82.001	100	78	42	65	76
ENSMUSG00000028194	Ddah1	110.302	1.90781	0.258095	7.3919	1.44746e-13	1.61857e-12		ENSMUSG00000028194	Ddah1	110.302	0.805229	0.245737	3.27679	0.00104994	0.0397665		ENSMUSG00000028194	42	46	59	161.001	139.052	134	82.001	96	84	48	60	63.006	145.365	189.726	155	115	137.997	120.002
ENSMUSG00000028255	Clca1	17615.6	2.39406	0.31799	7.52873	5.12378e-14	6.00666e-13		ENSMUSG00000028255	Clca1	17615.6	1.55428	0.31791	4.88904	1.01328e-06	0.000216491		ENSMUSG00000028255	5038	6103.48	3779.42	27617.9	18650.5	24234.1	6622.55	7317.34	9423.07	2085.36	3988.75	2768.5	39504.4	18820.7	29918.4	32333.2	52669.3	28533.6
ENSMUSG00000028392	Bspry	1879.31	1.55744	0.206316	7.54884	4.39141e-14	5.17776e-13		ENSMUSG00000028392	Bspry	1879.31	0.772829	0.205769	3.75581	0.000172782	0.0119477		ENSMUSG00000028392	1064.83	860.978	993.419	2911.17	2015	2981.59	1339.77	1318.82	1691.75	1048	1296.38	1181.89	2623.01	2143.9	2919.79	2027.01	2804.29	2523.24
ENSMUSG00000028645	Slc2a1	1931.89	2.1878	0.196784	11.1178	1.02812e-28	4.1163e-27		ENSMUSG00000028645	Slc2a1	1931.89	0.640283	0.195146	3.28105	0.00103422	0.0395306		ENSMUSG00000028645	634.523	854.501	611.445	2569.91	3180.37	3103.64	1452.79	2161.91	2170.66	519.994	684.715	724.001	2712.52	3064.82	2239.31	2601.47	2516.31	2830.96
ENSMUSG00000028681	Ptch2	212.907	-4.67239	0.378203	-12.3542	4.6236e-35	2.80108e-33		ENSMUSG00000028681	Ptch2	212.907	-1.29632	0.398797	-3.25058	0.00115171	0.0418928		ENSMUSG00000028681	436.18	390.001	545	33	18	22	46	39	34.395	616.159	383.218	670.001	35	33	41	17	22.001	49.588
ENSMUSG00000028698	Pik3r3	1886.94	1.91426	0.172579	11.0921	1.37042e-28	5.40451e-27		ENSMUSG00000028698	Pik3r3	1886.94	-0.67316	0.169788	-3.96471	7.34844e-05	0.00661955		ENSMUSG00000028698	501	679.878	543.723	2363.49	1920.06	1400	2269.49	2367.66	3290.29	809.739	741.412	778.113	2244.04	2332.86	2007.33	2382.81	3040.76	3053.25
ENSMUSG00000028751	Pla2g2e	53.6909	3.94303	0.568694	6.93348	4.10624e-12	3.94701e-11		ENSMUSG00000028751	Pla2g2e	53.6909	2.97119	0.518732	5.72781	1.01737e-08	5.84638e-06		ENSMUSG00000028751	9	6	1	45	69.001	106	6	12.04	10	5	4	3	78	55	87	133	209.002	137
ENSMUSG00000028786	Tmem54	223.399	3.17388	0.447184	7.09749	1.27047e-12	1.30135e-11		ENSMUSG00000028786	Tmem54	223.399	1.95333	0.43943	4.44513	8.78377e-06	0.00140681		ENSMUSG00000028786	76	43	35	370.106	290.001	628	45	168.999	113	64.001	47	61	325.992	269.001	231.045	370	503.191	336.254
ENSMUSG00000029063	Nadk	4296.89	1.12158	0.133695	8.38907	4.89984e-17	7.55149e-16		ENSMUSG00000029063	Nadk	4296.89	-0.438915	0.133045	-3.299	0.000970293	0.0379576		ENSMUSG00000029063	1788.54	2952.46	2549.89	5647.72	4579	4033.44	5995.01	4982.54	6705.23	1899.27	2687.64	2791.85	5435.12	4825.73	5306.51	4038.86	4684.01	5513.27
ENSMUSG00000029125	Stx18	1631.9	-0.789235	0.233727	-3.37674	0.000733514	0.00214091		ENSMUSG00000029125	Stx18	1631.9	-0.935505	0.23384	-4.00062	6.31762e-05	0.00598199		ENSMUSG00000029125	2332.01	1759.25	2695.79	1406.31	1040.9	1349.84	2151.22	1399.87	2307.9	1843.61	1730.85	1795.7	1147.02	1096.58	1313.4	926.901	1223	1397.39
ENSMUSG00000029177	Cenpa	509.247	1.70667	0.344481	4.95433	7.25801e-07	3.65221e-06		ENSMUSG00000029177	Cenpa	509.247	1.51914	0.344088	4.41499	1.01015e-05	0.00156272		ENSMUSG00000029177	277.322	255	276.571	907.817	597.093	872.878	236.24	427.086	254.504	310.305	280.92	307.246	813.624	472.878	783.7	673.46	828.626	400.227
ENSMUSG00000029283	Cdc7	546.289	0.496453	0.164231	3.02289	0.00250377	0.00653052		ENSMUSG00000029283	Cdc7	546.289	-0.592448	0.162067	-3.65558	0.000256598	0.0157794		ENSMUSG00000029283	345.132	443.721	443.997	565.002	501.999	468	586.695	768.011	765.074	376.001	345.967	557	475.758	482.001	470.016	545	850.482	725.894
ENSMUSG00000029304	Spp1	7457.07	4.98911	0.296271	16.8396	1.2498e-63	3.5965e-61		ENSMUSG00000029304	Spp1	7457.07	-2.74004	0.288441	-9.49948	2.10942e-21	1.17178e-17		ENSMUSG00000029304	125	220	118	4514.77	3562.23	4797.26	31595.9	16515	33705.5	136.755	79	104	4928.39	3183.37	4847.39	4594.97	6088.24	6192.11
ENSMUSG00000029321	Slc10a6	108.368	-2.10266	0.466606	-4.50628	6.59737e-06	2.83887e-05		ENSMUSG00000029321	Slc10a6	108.368	-1.64898	0.468643	-3.51863	0.000433784	0.0226533		ENSMUSG00000029321	176	256.032	203	36.374	61	38	206.091	45	144	118	115	135	31.007	75	56	73	51	141
ENSMUSG00000029375	Cxcl15	159.282	-4.78324	0.596384	-8.0204	1.054e-15	1.43048e-14		ENSMUSG00000029375	Cxcl15	159.282	-2.27481	0.605353	-3.75782	0.000171403	0.0119477		ENSMUSG00000029375	438	203	471.444	16	8	13	39	42	87.93	688.555	169.924	700.903	17.949	15	9	4	26	10
ENSMUSG00000029503	P2rx2	77.7441	-2.40628	0.377262	-6.37827	1.79102e-10	1.42423e-09		ENSMUSG00000029503	P2rx2	77.7441	-1.25337	0.385767	-3.24903	0.001158	0.0418928		ENSMUSG00000029503	117	257.974	143.324	36	18	29	66.157	51.001	80	72.999	164.004	219.999	25.22	15	20.999	39	64.999	49.001
ENSMUSG00000029561	Oasl2	3314.04	1.06254	0.151233	7.0258	2.1285e-12	2.11781e-11		ENSMUSG00000029561	Oasl2	3314.04	0.789743	0.15114	5.22525	1.73918e-07	5.68302e-05		ENSMUSG00000029561	1801.14	1943.99	2183.06	4432.9	3416.8	3658	2112.77	2008.46	2344.26	1551.76	1759.03	1809.38	5326.3	3913.38	4911.64	4602.99	6897.16	5621.92
ENSMUSG00000029811	Aoc1	9022.51	10.4817	0.415277	25.2402	1.45234e-140	4.45796e-137		ENSMUSG00000029811	Aoc1	9022.51	1.09187	0.340181	3.20966	0.0013289	0.0458439		ENSMUSG00000029811	10	16	11	21502.3	12503.5	14791.3	8338.84	6396.61	6130.34	10	41	12	17445.2	17311.7	16981.9	13688.9	15463.4	14616.5
ENSMUSG00000029822	Osbpl3	1612.21	1.71745	0.127984	13.4193	4.66365e-41	4.01357e-39		ENSMUSG00000029822	Osbpl3	1612.21	0.481643	0.127048	3.79102	0.000150028	0.0108235		ENSMUSG00000029822	765.544	1108.67	911.229	2316.16	1884.21	1679	1152.77	1315.44	1598.9	890.417	1228.88	955.343	1955.42	2033.33	1794.23	1866.42	2129.21	2053.02
ENSMUSG00000030029	Lrig1	2984.36	1.45421	0.18248	7.96915	1.59772e-15	2.14157e-14		ENSMUSG00000030029	Lrig1	2984.36	0.729719	0.181964	4.01023	6.0659e-05	0.0059016		ENSMUSG00000030029	1043.26	1709.78	1494.7	4128.37	3543.03	3049.48	1678.27	2823.15	2127.77	1404	1542.35	2108.33	4656.24	4515.59	4671.73	3672.95	5648.5	4695.68
ENSMUSG00000030087	Klf15	474.186	-2.73918	0.337869	-8.10721	5.17941e-16	7.22645e-15		ENSMUSG00000030087	Klf15	474.186	-1.15822	0.339836	-3.40819	0.000653952	0.0298016		ENSMUSG00000030087	728	1502.92	1445.52	171	177	134	524.634	236.469	312.837	463.938	823.495	1115.17	133	118	154	157	182	406.057
ENSMUSG00000030103	Bhlhe40	5310.61	2.22704	0.121638	18.3087	7.0494e-75	3.32894e-72		ENSMUSG00000030103	Bhlhe40	5310.61	0.388971	0.120468	3.22882	0.00124302	0.0437056		ENSMUSG00000030103	1371.58	1809.32	1751.44	7014.69	6383.89	7349.19	4266.03	4817.94	5508.96	1919.45	1997.69	1982.74	8269.6	6820.43	7398.94	7005.65	10027.7	8851.55
ENSMUSG00000030107	Usp18	587.897	1.57738	0.175694	8.97799	2.75751e-19	5.23018e-18		ENSMUSG00000030107	Usp18	587.897	0.953983	0.173744	5.49073	4.00267e-08	1.71037e-05		ENSMUSG00000030107	314	246.09	316.999	901.763	756	969.349	390.804	373	485.93	219	235	271.999	1101.49	837.889	935.001	643.2	926.06	807.243
ENSMUSG00000030111	A2m	2086.67	4.14311	0.472468	8.76907	1.80149e-18	3.1719e-17		ENSMUSG00000030111	A2m	2086.67	-1.77662	0.465048	-3.82028	0.0001333	0.0100065		ENSMUSG00000030111	116	101.017	75	1266.76	2510.82	1047	6437.31	4742.41	4039.06	226	87	131	1547.12	2841.55	2075.79	2006.53	1351	5898.58
ENSMUSG00000030351	Tspan11	322.254	-1.12713	0.36087	-3.12335	0.00178802	0.0048242		ENSMUSG00000030351	Tspan11	322.254	1.31226	0.369698	3.54954	0.000385902	0.0210854		ENSMUSG00000030351	570	472.063	609	228	203	271	63	151	55	719	334	661	253.169	303.937	233	206	215.019	299.897
ENSMUSG00000030560	Ctsc	2184.7	1.03309	0.157137	6.57448	4.88239e-11	4.13231e-10		ENSMUSG00000030560	Ctsc	2184.7	-0.612312	0.156036	-3.92416	8.70317e-05	0.00725191		ENSMUSG00000030560	1262	1318.61	1044.28	2695.03	2239	1590.93	3116.22	2921.11	2940.05	1384.52	1252.98	1316.35	2252.69	2519.54	2629.69	2180.16	2701.67	3249.37
ENSMUSG00000030708	Dnajb13	11.1249	2.02131	0.793858	2.54618	0.0108908	0.0241163		ENSMUSG00000030708	Dnajb13	11.1249	4.18287	1.10399	3.78886	0.000151338	0.0108709		ENSMUSG00000030708	8	6	10	19	20	44	0	2	1	7	5	6	12	28	12	4	14	7
ENSMUSG00000030711	Sult1a1	330.005	-4.29391	0.323861	-13.2585	4.02834e-40	3.29733e-38		ENSMUSG00000030711	Sult1a1	330.005	-1.12358	0.333528	-3.36877	0.000755055	0.0326831		ENSMUSG00000030711	934.932	1480.67	755.72	52.322	42	53	107.005	62	128	542.022	979.932	694.485	32	27	29	52	66	132.736
ENSMUSG00000030792	Dkkl1	245.844	4.57419	0.406295	11.2583	2.10809e-29	8.86409e-28		ENSMUSG00000030792	Dkkl1	245.844	2.23904	0.376897	5.94072	2.83774e-09	1.81888e-06		ENSMUSG00000030792	23	31	16.01	379.988	379	452	45	132	111	12	16	18	518	372	451	411	519.002	409.002
ENSMUSG00000030862	Cpxm2	279.417	-2.08367	0.255183	-8.1654	3.2038e-16	4.5493e-15		ENSMUSG00000030862	Cpxm2	279.417	-1.32321	0.259093	-5.10709	3.27162e-07	9.40027e-05		ENSMUSG00000030862	678.084	595.564	614.059	84	103.001	81	200.001	148	395	496.18	618.999	896.464	90	80.9	87	95	85	121
ENSMUSG00000030867	Plk1	356.064	2.68023	0.53301	5.02848	4.94372e-07	2.55467e-06		ENSMUSG00000030867	Plk1	356.064	1.71585	0.530457	3.23466	0.00121786	0.0432743		ENSMUSG00000030867	110	93.998	117	772.969	433	716.522	78	369.988	110	166	97	172	730.21	366	583.991	443	840.218	197
ENSMUSG00000031098	Syt8	304.024	3.63329	0.460999	7.88133	3.23904e-15	4.23976e-14		ENSMUSG00000031098	Syt8	304.024	1.44659	0.452879	3.19422	0.00140209	0.0470508		ENSMUSG00000031098	89	54.001	32	393	423.999	721.999	81.771	267.999	205.007	37	58	47	371	342.064	278.138	541.999	563.816	506.282
ENSMUSG00000031129	Slc9a9	178.173	0.987703	0.286345	3.44935	0.000561944	0.001682		ENSMUSG00000031129	Slc9a9	178.173	0.940356	0.287339	3.27264	0.0010655	0.0399922		ENSMUSG00000031129	159	149	75.649	210	298	204	82	134	136.015	123	108	109	216.264	264	188.288	228.97	268	260
ENSMUSG00000031169	Porcn	815.103	-1.11109	0.233149	-4.76556	1.88326e-06	8.86381e-06		ENSMUSG00000031169	Porcn	815.103	0.959721	0.237079	4.04811	5.1633e-05	0.00518352		ENSMUSG00000031169	1667.44	1447.6	1116.81	541	677	570.004	264.941	308.999	320	1246.98	1512.91	1300.88	514.226	919.038	587.126	651.492	633.217	582.183
ENSMUSG00000031232	Magt1	2279.5	0.90654	0.136698	6.63171	3.31814e-11	2.86364e-10		ENSMUSG00000031232	Magt1	2279.5	-0.572528	0.13556	-4.22342	2.40627e-05	0.00300844		ENSMUSG00000031232	1240.82	1340.2	1292.87	2721.45	2288.38	1562.39	2939.68	3030.74	3121.64	1410.26	1256.37	1440.54	2520.77	2448.24	2399.43	2882.47	3223.97	3434.98
ENSMUSG00000031245	Hmgn5	853.697	1.04798	0.208951	5.01546	5.29055e-07	2.72092e-06		ENSMUSG00000031245	Hmgn5	853.697	0.802281	0.208959	3.83941	0.000123328	0.00947124		ENSMUSG00000031245	704.997	615.219	518.09	1221.86	993.014	1219	474.197	660.52	722.006	683.997	642.011	675	1182.37	927	1159.69	851.707	1179.68	861.693
ENSMUSG00000031266	Gla	233.262	1.25263	0.188474	6.64618	3.00788e-11	2.61179e-10		ENSMUSG00000031266	Gla	233.262	0.649486	0.185673	3.49802	0.000468731	0.0237429		ENSMUSG00000031266	148	164	146	319	263	358	160	218	218	139.001	115	156	295	273.024	289	260	319	315.36
ENSMUSG00000031273	Col4a6	1242.21	-1.37022	0.302821	-4.52486	6.0435e-06	2.61582e-05		ENSMUSG00000031273	Col4a6	1242.21	-1.49704	0.302851	-4.94316	7.68666e-07	0.000186323		ENSMUSG00000031273	1139.03	2452.02	1758.98	882.074	759	296	1901.64	1124.09	1963.36	1122.98	1897.07	2200.55	744.403	813	896.002	719	764.368	1188.18
ENSMUSG00000031298	Adgrg2	207.778	-1.05566	0.3734	-2.82715	0.00469639	0.0114865		ENSMUSG00000031298	Adgrg2	207.778	-1.82107	0.372415	-4.88988	1.00897e-06	0.000216491		ENSMUSG00000031298	247.347	267.118	232.025	123	129	68	320.41	280.9	406.173	395.001	150.999	300	84.057	115	96.001	110	146.407	289.191
ENSMUSG00000031375	Bgn	5618.12	0.897283	0.183346	4.89392	9.88461e-07	4.87533e-06		ENSMUSG00000031375	Bgn	5618.12	-0.602504	0.182998	-3.2924	0.000993353	0.0385058		ENSMUSG00000031375	2605.25	4347.52	2993.6	5866.04	7033.87	4129.97	8257.08	7233.69	8688.43	3156.92	2490.26	3941.08	6319.09	7154.02	6210.35	6278.02	6037.6	7706.06
ENSMUSG00000031381	Piga	570.382	0.340486	0.142164	2.39502	0.0166192	0.0349842		ENSMUSG00000031381	Piga	570.382	-0.671667	0.139664	-4.80916	1.51564e-06	0.000304316		ENSMUSG00000031381	351.001	486.001	460.315	585.063	546.999	375.001	677.15	775	825.744	369.083	439.065	481.016	560.152	449.005	462.002	635.053	902.732	871.086
ENSMUSG00000031584	Gsr	2187.51	1.91963	0.191572	10.0204	1.23965e-23	3.42287e-22		ENSMUSG00000031584	Gsr	2187.51	0.678148	0.190534	3.55919	0.000371999	0.0205959		ENSMUSG00000031584	611	1082.9	1008.71	3250.01	2489	3139.82	1549.99	1797.21	2069.62	735.318	1202.93	1117	3022.05	2877.34	3053.85	2743.01	4187.63	3222.5
ENSMUSG00000031609	Sap30	200.552	0.472463	0.19209	2.45958	0.0139098	0.0298669		ENSMUSG00000031609	Sap30	200.552	0.630718	0.194921	3.23577	0.00121317	0.0431996		ENSMUSG00000031609	201	182.705	224.391	251.001	226	291	129	164	171	138.06	184.564	237	190.222	213	201	175.624	215	221.003
ENSMUSG00000031667	Aktip	2000.6	0.775532	0.173368	4.47332	7.70126e-06	3.27561e-05		ENSMUSG00000031667	Aktip	2000.6	0.583589	0.173383	3.3659	0.000762939	0.0329388		ENSMUSG00000031667	1684.55	1651.48	1575.59	2705.11	1980.24	3146.88	1593.75	1416.95	1858.6	1172.42	1465.17	1529.13	2680.65	2182.97	2451.78	1946.93	2670.78	2308.8
ENSMUSG00000031668	Eif2ak3	953.052	0.896148	0.138311	6.4792	9.22083e-11	7.55091e-10		ENSMUSG00000031668	Eif2ak3	953.052	-0.438619	0.135868	-3.22826	0.00124544	0.0437056		ENSMUSG00000031668	415.002	678.01	548.88	994.374	1001	689	1028.34	1160.66	1128.09	532	590.159	723.518	1034.95	1159	1188.65	1225	1417.96	1526.16
ENSMUSG00000031712	Il15	166.864	-0.667713	0.200271	-3.33405	0.000855924	0.00246305		ENSMUSG00000031712	Il15	166.864	-0.893352	0.202573	-4.41003	1.03356e-05	0.0015697		ENSMUSG00000031712	247.175	223.001	225.999	124.001	114.001	123.999	176.002	137.001	229.056	208.999	221.001	216.999	122	130	103	114	128	144.118
ENSMUSG00000031770	Herpud1	2637.45	-0.445182	0.161704	-2.75306	0.00590408	0.0140268		ENSMUSG00000031770	Herpud1	2637.45	-0.702507	0.161618	-4.34671	1.38194e-05	0.00195374		ENSMUSG00000031770	2204.59	3391.77	3277.1	1886.08	2168.98	2087.57	3016.49	3332.1	3550.94	1747.41	2410.1	3367	2108.57	2024.88	2080.41	2432	3038.74	3627.23
ENSMUSG00000031842	Pde4c	145.18	-1.46506	0.322732	-4.53957	5.63692e-06	2.45252e-05		ENSMUSG00000031842	Pde4c	145.18	-1.15312	0.327583	-3.52007	0.000431429	0.0226093		ENSMUSG00000031842	288.142	194.473	199	92.062	56.042	61	109.915	104.175	124.001	296.113	199.048	261.599	62	103.026	96.283	110.001	156.026	177.434
ENSMUSG00000031919	Tmed6	24.2708	-2.3627	0.68392	-3.45465	0.000551008	0.00165249		ENSMUSG00000031919	Tmed6	24.2708	-2.32727	0.686253	-3.39127	0.000695708	0.0307532		ENSMUSG00000031919	63	16	37	10	3	9	48	11	43	65	38.948	47	5	4	5	5	9.001	7
ENSMUSG00000032058	Ppp2r1b	1296.33	0.939511	0.170815	5.50018	3.79404e-08	2.30382e-07		ENSMUSG00000032058	Ppp2r1b	1296.33	-0.549629	0.169153	-3.2493	0.00115691	0.0418928		ENSMUSG00000032058	692	861.553	721.39	1814.28	1376	1244.01	2225.02	1455.12	2245.56	747.658	694.394	892.001	1537.74	1436.86	1646.01	1068.07	1304.5	1345.28
ENSMUSG00000032218	Ccnb2	375.8	2.89091	0.541036	5.34328	9.12793e-08	5.25013e-07		ENSMUSG00000032218	Ccnb2	375.8	2.22861	0.539499	4.13089	3.61355e-05	0.00398807		ENSMUSG00000032218	177.017	53	95.619	877.63	485.168	960.744	113	243.018	109	196.211	52	131	673.086	399	723.349	471	665.695	260.155
ENSMUSG00000032294	Pkm	16904	1.45652	0.166728	8.73591	2.41711e-18	4.20358e-17		ENSMUSG00000032294	Pkm	16904	0.633782	0.16664	3.80329	0.000142785	0.0104825		ENSMUSG00000032294	7565.93	9944.91	9155.53	22952.4	19915.8	26941.2	10787.2	17000.7	14522.1	6920.31	7597.3	10245.9	25525.8	22455.2	23377.7	20191.2	25506.5	26515.7
ENSMUSG00000032349	Elovl5	6385.91	0.721992	0.137877	5.23648	1.63665e-07	9.0954e-07		ENSMUSG00000032349	Elovl5	6385.91	-0.486605	0.137571	-3.53713	0.000404496	0.0216055		ENSMUSG00000032349	3561.37	4499.26	4099.51	7649.44	5836	4689.93	7580.06	6794.99	9345.67	4704.11	5201.15	4564.37	6401.69	6270.53	7236.63	6871.79	9261.31	9979.36
ENSMUSG00000032355	Mlip	60.7243	2.61943	0.393573	6.65552	2.82306e-11	2.45827e-10		ENSMUSG00000032355	Mlip	60.7243	1.56249	0.3692	4.23208	2.31537e-05	0.00294546		ENSMUSG00000032355	23	16.001	15.999	116	89	89	22	52	33	4	6	8	91.064	97.001	109.001	75.001	75.001	100.132
ENSMUSG00000032661	Oas3	602.439	4.07428	0.271692	14.996	7.79923e-51	1.09648e-48		ENSMUSG00000032661	Oas3	602.439	1.16005	0.242925	4.77532	1.79422e-06	0.00035596		ENSMUSG00000032661	37.373	56.807	35.181	1048.88	775.952	639.941	236.35	391.763	410.938	21	30.161	22.988	1238.05	904.302	1120.55	1126.49	1752.93	1292.73
ENSMUSG00000032690	Oas2	2193.93	2.24265	0.19702	11.3829	5.0891e-30	2.22099e-28		ENSMUSG00000032690	Oas2	2193.93	0.836747	0.195315	4.2841	1.8348e-05	0.00238882		ENSMUSG00000032690	621.999	570.001	655.17	3182.34	2321	2377.85	1391.45	1408.98	1833.72	475	452.002	610.995	3524.31	2721.73	3107.22	4057.96	5927.44	4467.99
ENSMUSG00000032840	2410131K14Rik	541.779	-0.394085	0.127666	-3.08684	0.00202294	0.00539559		ENSMUSG00000032840	2410131K14Rik	541.779	-0.512123	0.127922	-4.0034	6.24397e-05	0.00594604		ENSMUSG00000032840	494.984	679.574	656.774	463	454	367	621.117	496.055	598	573.002	629.069	760.127	506.36	492	441	411	541.976	606.775
ENSMUSG00000032978	Guca2b	399.529	5.63691	0.599042	9.40988	4.96706e-21	1.0995e-19		ENSMUSG00000032978	Guca2b	399.529	-3.25045	0.441419	-7.36363	1.78979e-13	4.26097e-10		ENSMUSG00000032978	1	6	6	131	101	293.906	2268.56	732.159	1812.03	2	1	1	170	164	168	175	276	277
ENSMUSG00000033213	AA467197	83.7164	4.04463	0.603448	6.70254	2.04832e-11	1.81453e-10		ENSMUSG00000033213	AA467197	83.7164	3.15268	0.570266	5.52844	3.23098e-08	1.45525e-05		ENSMUSG00000033213	7	4	10	70	81	186	6	17	14	9	1	5	146.003	190	110	222.002	262.193	213.605
ENSMUSG00000033327	Tnxb	3495.4	-2.84352	0.285723	-9.95199	2.47183e-23	6.60722e-22		ENSMUSG00000033327	Tnxb	3495.4	-0.969386	0.286182	-3.38731	0.000705827	0.0310945		ENSMUSG00000033327	4481.32	11548	9259.82	1524.96	1193.1	595.821	2584.32	1372.54	1992.15	5333.99	6432.88	9811.75	1341.71	1298.88	1244.99	1330.82	1402.01	1893.08
ENSMUSG00000033355	Rtp4	1095.87	1.33029	0.183187	7.26193	3.81606e-13	4.10516e-12		ENSMUSG00000033355	Rtp4	1095.87	0.641621	0.182431	3.51707	0.000436347	0.0226533		ENSMUSG00000033355	639.129	549.242	647.735	1437.75	1198	1460.39	783.079	756.899	922.925	483.331	474.588	500.608	1794.41	1335.31	1458.47	1462.94	1934.59	1743.48
ENSMUSG00000033706	Smyd5	929.787	-0.902417	0.122653	-7.35746	1.87447e-13	2.06968e-12		ENSMUSG00000033706	Smyd5	929.787	-0.559703	0.123435	-4.53438	5.77724e-06	0.000962777		ENSMUSG00000033706	1132	1411.73	1298.39	796.963	693.999	619	945.053	888.354	998.331	925.171	1052	1424.08	718	781	767.163	603.096	710.93	788.945
ENSMUSG00000033752	Mnd1	110.036	-1.26891	0.342836	-3.70121	0.000214573	0.000703667		ENSMUSG00000033752	Mnd1	110.036	1.25751	0.365772	3.43796	0.000586115	0.0275921		ENSMUSG00000033752	315	217	197.692	78	65	130	32	32	46	167	176.993	188.857	75	53	60	55	74	42
ENSMUSG00000033909	Usp36	1280.8	-0.457164	0.12258	-3.72951	0.000191855	0.000636304		ENSMUSG00000033909	Usp36	1280.8	-0.44871	0.122732	-3.65601	0.000256171	0.0157794		ENSMUSG00000033909	1114.98	1909.94	1465.97	1175.23	1052	933	1345.23	1182.53	1513.01	1136	1480.65	1612	1330.04	1200.01	1126.12	955	1219.41	1398.93
ENSMUSG00000034039	Prss29	8.2502	3.72767	1.41802	2.62878	0.00856923	0.0195565		ENSMUSG00000034039	Prss29	8.2502	-3.18312	0.801091	-3.97348	7.08288e-05	0.00641501		ENSMUSG00000034039	0	0	1	3	6	4	35	32	46	0	0	0	3	1	0	1	1	4
ENSMUSG00000034227	Foxj1	101.716	2.8484	0.501657	5.67799	1.36286e-08	8.76081e-08		ENSMUSG00000034227	Foxj1	101.716	3.30846	0.513842	6.43867	1.20528e-10	1.05716e-07		ENSMUSG00000034227	14	19	56	154	204	224	12	31	15	35	52	107	132.009	262	153	105	170	99.001
ENSMUSG00000034459	Ifit1	840.537	0.572946	0.243276	2.35512	0.0185167	0.0384466		ENSMUSG00000034459	Ifit1	840.537	0.793681	0.244079	3.25174	0.00114702	0.0418928		ENSMUSG00000034459	798.762	666.157	518.969	1128.94	879.28	724	482.479	443.979	530.957	477.01	692.226	538.709	1480.68	875.996	1034.96	1072.24	1650.53	1254.57
ENSMUSG00000034796	Cpne7	74.4907	-1.51171	0.561899	-2.69035	0.0071377	0.0166336		ENSMUSG00000034796	Cpne7	74.4907	-1.85558	0.5614	-3.30527	0.000948849	0.0376944		ENSMUSG00000034796	147	57.707	93.001	31	29.001	34	183	52	108	112	57.002	107	19.001	30	43.001	34	84.233	110.987
ENSMUSG00000035274	Tpbg	217.931	-0.820598	0.20512	-4.00058	6.31879e-05	0.000229352		ENSMUSG00000035274	Tpbg	217.931	0.683609	0.215334	3.17465	0.00150019	0.0490208		ENSMUSG00000035274	252.001	287	337.003	183	169	154	82	131	98	309.001	488	338.999	199.001	169.992	200	150	195	200.492
ENSMUSG00000035429	Ptprh	149.702	6.47035	0.66028	9.79941	1.1325e-22	2.87685e-21		ENSMUSG00000035429	Ptprh	149.702	1.42834	0.450577	3.17004	0.00152419	0.0493217		ENSMUSG00000035429	4	1	3	264	207	239	23	88	59	2	0	4	289.108	276.001	219	309.999	433.995	295.792
ENSMUSG00000035692	Isg15	625.683	2.40779	0.284838	8.45322	2.83388e-17	4.47996e-16		ENSMUSG00000035692	Isg15	625.683	1.0435	0.281305	3.70951	0.000207664	0.0136249		ENSMUSG00000035692	207.008	175	194	818.406	705	1285.99	420.438	436	454	105	170.001	172.469	1215.64	720.715	1002.94	903.071	1300.96	938.283
ENSMUSG00000035713	Usp35	590.995	-0.934557	0.210273	-4.44449	8.81004e-06	3.70622e-05		ENSMUSG00000035713	Usp35	590.995	0.845996	0.214966	3.9355	8.30251e-05	0.0070438		ENSMUSG00000035713	887.084	1091	941.229	461.81	460	493	196.998	321.846	256.001	1110.18	749.473	941.394	416.999	558.917	406.999	409.177	415	532.064
ENSMUSG00000035845	Alg12	453.74	0.450227	0.120591	3.7335	0.00018884	0.000627435		ENSMUSG00000035845	Alg12	453.74	-0.459882	0.116912	-3.93358	8.36887e-05	0.0070438		ENSMUSG00000035845	332.016	357.006	293.184	469.071	432.001	376	509.465	531.998	631.443	281	301.288	348.001	474.276	471	470.522	534.001	692.128	674.42
ENSMUSG00000035914	Cd276	501.242	1.29613	0.20641	6.27939	3.39894e-10	2.60609e-09		ENSMUSG00000035914	Cd276	501.242	0.851074	0.204088	4.17013	3.04433e-05	0.00347491		ENSMUSG00000035914	187.992	263.188	263.08	661	556	647	287.028	361	411	293	244.015	332.874	756.106	784.995	758.967	777	881.884	711.341
ENSMUSG00000036158	Prickle1	522.811	-1.59213	0.17961	-8.86433	7.69624e-19	1.40477e-17		ENSMUSG00000036158	Prickle1	522.811	-0.605785	0.182294	-3.32312	0.000890165	0.0365384		ENSMUSG00000036158	704	989.999	1072.37	323	318	203	456.006	327	417	766.576	895.999	1148.37	292	322	328.742	252.045	336.981	420.16
ENSMUSG00000036172	Cd200r3	170.463	5.00325	0.398434	12.5573	3.62467e-36	2.35885e-34		ENSMUSG00000036172	Cd200r3	170.463	2.3026	0.317026	7.26312	3.7826e-13	7.87962e-10		ENSMUSG00000036172	6	14.603	10.31	241.124	260.784	219.271	30.396	98.473	49.576	13.622	7.784	12.18	222.734	414.272	309.924	278.084	293.021	327.852
ENSMUSG00000036281	Snapc4	1185.18	-1.51522	0.113343	-13.3684	9.24665e-41	7.88405e-39		ENSMUSG00000036281	Snapc4	1185.18	-0.455812	0.115292	-3.95356	7.69981e-05	0.00682539		ENSMUSG00000036281	1793.68	2375.52	2137.78	813.001	660.006	553.014	953.347	730.459	1019.54	1574.51	1842.06	2256.53	752.995	811.224	814	665	837.35	987.275
ENSMUSG00000036411	9530077C05Rik	156.302	-0.966782	0.256403	-3.77056	0.000162879	0.000547699		ENSMUSG00000036411	9530077C05Rik	156.302	1.02567	0.270296	3.79464	0.000147859	0.0107133		ENSMUSG00000036411	226	264.995	302.029	129	123	169	70	58.016	84	213	183	231	148.15	134.001	116	103	85	89
ENSMUSG00000036854	Hspb6	232.21	-1.03297	0.20256	-5.09956	3.40444e-07	1.80171e-06		ENSMUSG00000036854	Hspb6	232.21	-0.735275	0.204469	-3.59603	0.000323112	0.0186967		ENSMUSG00000036854	400.872	364.06	292.252	189	155	156	283	231	244.143	216	256	274	224.001	168.16	222	134	169.511	181
ENSMUSG00000037033	Clca3b	36.8918	4.0802	0.563386	7.24228	4.41217e-13	4.71066e-12		ENSMUSG00000037033	Clca3b	36.8918	1.29955	0.379827	3.42142	0.000622962	0.0288379		ENSMUSG00000037033	4	4	2.001	82.957	38.002	38	22.001	22	15	5	9	7	66.948	74.004	56	67.001	71	90
ENSMUSG00000037145	2210407C18Rik	21.6715	7.07868	1.2531	5.64896	1.61426e-08	1.02587e-07		ENSMUSG00000037145	2210407C18Rik	21.6715	1.74017	0.53528	3.25095	0.0011502	0.0418928		ENSMUSG00000037145	0	0	0	16	21	30	5	9	6	0	0	0	35	43	40	64	65	55.088
ENSMUSG00000037202	Prf1	32.4497	-2.43811	0.669596	-3.64117	0.000271406	0.000873251		ENSMUSG00000037202	Prf1	32.4497	-3.22229	0.665741	-4.84015	1.29741e-06	0.00026693		ENSMUSG00000037202	32	36	69.059	9	13	2	86	82	35	39	29	58	18	10	11	8	5	31
ENSMUSG00000037313	Tacc3	550.203	2.20064	0.455405	4.83227	1.34985e-06	6.49431e-06		ENSMUSG00000037313	Tacc3	550.203	1.57827	0.45463	3.47154	0.000517483	0.0253643		ENSMUSG00000037313	264.662	208.001	261.999	950.444	632.999	1331	196.996	515.999	276	295.036	197	269	858.935	491.471	783.999	665.166	1026	369.101
ENSMUSG00000037541	Shank2	314.026	-2.4581	0.442052	-5.56065	2.68769e-08	1.66776e-07		ENSMUSG00000037541	Shank2	314.026	-1.41685	0.444177	-3.18984	0.00142354	0.0475415		ENSMUSG00000037541	267	787.882	625.467	157.075	100	35	233	152.001	269	604.187	985.782	760.983	99	125.373	144	110	145	171
ENSMUSG00000037628	Cdkn3	74.9084	2.31934	0.611994	3.78981	0.000150765	0.000510693		ENSMUSG00000037628	Cdkn3	74.9084	2.10289	0.610409	3.44505	0.000570959	0.0270314		ENSMUSG00000037628	53.999	14	28	180	82	225	25.013	57	25.999	30	7	18	140	75.001	141.001	81	130	39.001
ENSMUSG00000037681	Esyt3	730.181	1.03406	0.209431	4.93747	7.9144e-07	3.95656e-06		ENSMUSG00000037681	Esyt3	730.181	0.816618	0.210233	3.88434	0.000102607	0.00830559		ENSMUSG00000037681	375	586.343	560.988	1029.99	752.001	637.46	340.607	446.992	424.07	528.296	705.412	879	1053.56	986.194	871	905.001	1179.21	945.115
ENSMUSG00000037686	Aspg	722.736	-2.5607	0.528473	-4.84547	1.26312e-06	6.09775e-06		ENSMUSG00000037686	Aspg	722.736	-1.68497	0.528963	-3.18542	0.00144543	0.0476993		ENSMUSG00000037686	1841.64	1325.39	984.913	243.892	172	229.008	920.26	273.036	782.141	2160.94	1090.76	1141.51	100	209.999	122	168	175.05	717.78
ENSMUSG00000037720	Tmem33	1773.34	1.0746	0.122856	8.74682	2.19449e-18	3.8309e-17		ENSMUSG00000037720	Tmem33	1773.34	-0.398192	0.122245	-3.25734	0.00112462	0.041464		ENSMUSG00000037720	1187.06	1491.34	1383.64	1834.7	1589.29	1037.01	1820.88	1944.67	1915.13	1371	1541.89	1739.34	1736.8	1619.1	1627.63	1638.38	2131.8	2352.35
ENSMUSG00000037725	Ckap2	269.641	2.22686	0.424248	5.24896	1.52957e-07	8.52864e-07		ENSMUSG00000037725	Ckap2	269.641	1.42776	0.420483	3.39553	0.000684949	0.0306023		ENSMUSG00000037725	117.288	62.972	103.543	498.615	356.005	425.787	101.684	248.984	157	168.979	73.092	141	444.898	360.52	454.798	445.344	413.201	224.108
ENSMUSG00000037826	Ppm1k	382.822	-0.714508	0.187615	-3.80838	0.000139881	0.000476632		ENSMUSG00000037826	Ppm1k	382.822	0.619481	0.192605	3.21633	0.00129842	0.0450794		ENSMUSG00000037826	695.021	629.624	613.19	321.691	269.432	239.165	246.802	233.544	216.956	573.444	515.008	607.008	254.697	310.18	336.402	284.078	322.604	388.939
ENSMUSG00000037960	Card19	493.012	0.590699	0.160152	3.68836	0.000225702	0.000737798		ENSMUSG00000037960	Card19	493.012	0.509524	0.160244	3.17967	0.00147441	0.0483683		ENSMUSG00000037960	341.036	465.999	447.014	578.803	549	686.939	343.564	405.248	475.685	313	382.353	442.462	562.666	607.001	656.047	449.001	552.065	678.755
ENSMUSG00000037965	Zc3h7a	3919.67	0.429881	0.0745749	5.76442	8.1938e-09	5.4185e-08		ENSMUSG00000037965	Zc3h7a	3919.67	-0.288005	0.0741974	-3.8816	0.000103772	0.00835443		ENSMUSG00000037965	2966.94	3623.11	2899.6	4360.77	3668.61	3379.23	3991.61	3997.2	4730.8	2705.46	3206.56	3465.37	3993.63	4180.83	4067.51	4430.14	5306.14	5384.5
ENSMUSG00000038037	Socs1	348.46	2.79782	0.260289	10.7489	5.99704e-27	2.13219e-25		ENSMUSG00000038037	Socs1	348.46	0.799545	0.250146	3.19631	0.00139195	0.0469425		ENSMUSG00000038037	56	99	137	591.205	590	664.001	292.002	424	297	80	85.047	83	514.002	472	552	413.744	359.995	483.061
ENSMUSG00000038086	Hspb2	122.71	1.49657	0.223616	6.69258	2.19275e-11	1.93535e-10		ENSMUSG00000038086	Hspb2	122.71	0.905469	0.218967	4.13518	3.54678e-05	0.00394047		ENSMUSG00000038086	57	103	74	192	155	213	86	108	104	37	55	71	150	184	141	134	162	167.986
ENSMUSG00000038143	Stox2	590.415	-1.34461	0.236815	-5.67789	1.36369e-08	8.76309e-08		ENSMUSG00000038143	Stox2	590.415	-0.773256	0.238057	-3.2482	0.00116139	0.0418928		ENSMUSG00000038143	522	1151.91	1022.39	391	374.999	174	517	439	545.601	1016.77	1090.21	1079	325.001	427	412	406.342	462.888	497.559
ENSMUSG00000038295	Atg9b	331.389	5.40892	0.320663	16.8679	7.74666e-64	2.26461e-61		ENSMUSG00000038295	Atg9b	331.389	0.819697	0.199426	4.11027	3.95196e-05	0.00427658		ENSMUSG00000038295	11	11	10	608.809	562	559	422.774	274	332.341	14	16	8	641.109	722	597	583	567.219	711.02
ENSMUSG00000038508	Gdf15	29.4017	3.4785	0.556472	6.25098	4.07875e-10	3.10663e-09		ENSMUSG00000038508	Gdf15	29.4017	1.65881	0.454563	3.64924	0.000263015	0.0160555		ENSMUSG00000038508	4	5	5	52	36	54	10	13	22	6	4	13	47.049	50	52.922	45	76.241	40
ENSMUSG00000038745	Nlrp6	267.26	1.51649	0.269763	5.62155	1.89249e-08	1.19527e-07		ENSMUSG00000038745	Nlrp6	267.26	-1.05476	0.26001	-4.05661	4.97898e-05	0.00512189		ENSMUSG00000038745	116	119.003	89	244.001	230	311	558.278	407.377	673.81	51	80	104	197.018	336	331.041	216	255.069	405.001
ENSMUSG00000038777	Sema6c	325.742	-2.13386	0.204806	-10.4189	2.03254e-25	6.39885e-24		ENSMUSG00000038777	Sema6c	325.742	0.704046	0.220302	3.19582	0.00139433	0.0469425		ENSMUSG00000038777	726.002	931.241	776.852	170	187	175	109.126	74	93.999	541.035	554.979	868.002	164.988	189.933	163.001	153.999	138	166.469
ENSMUSG00000038994	Hils1	7.70633	3.14381	0.96151	3.26966	0.00107677	0.00303829		ENSMUSG00000038994	Hils1	7.70633	3.4981	1.02883	3.40006	0.000673707	0.0302623		ENSMUSG00000038994	4	0	3	12	19	27	0	3	2	3	0	0	13	13	16	10	4	6
ENSMUSG00000039193	Nlrc4	75.129	2.09063	0.307018	6.80947	9.79563e-12	9.03777e-11		ENSMUSG00000039193	Nlrc4	75.129	1.16357	0.287281	4.05027	5.11579e-05	0.00518352		ENSMUSG00000039193	21.793	22.997	22.652	125.491	86.38	55.779	27.175	36.617	47.068	19.052	15.631	18.483	106.207	135.459	124.669	120.42	179.967	189.406
ENSMUSG00000039230	Tbcd	1250.46	0.589043	0.193948	3.03711	0.00238855	0.00626368		ENSMUSG00000039230	Tbcd	1250.46	0.634872	0.19358	3.27963	0.00103943	0.0395483		ENSMUSG00000039230	888	1001.81	906.815	1571	1375	1371	1026.59	1182	1225	886.001	1026.35	1009.17	1525.95	1677.27	1518.72	1200	1580.2	1525.19
ENSMUSG00000039236	Isg20	405.588	0.441076	0.175137	2.51847	0.0117866	0.0258391		ENSMUSG00000039236	Isg20	405.588	-0.651718	0.172074	-3.78742	0.000152218	0.0108872		ENSMUSG00000039236	309.001	307	279	380.004	357	381	589.989	430.998	633.976	228	187.001	257.088	355.503	431	435	478	583.354	619.518
ENSMUSG00000039372	Marchf4	52.5682	7.11283	1.08994	6.52589	6.75975e-11	5.64089e-10		ENSMUSG00000039372	Marchf4	52.5682	1.5717	0.417917	3.76079	0.000169377	0.0118599		ENSMUSG00000039372	0	0	2	89	100	66	10	32	40	1	0	0	116	163	93	84	74	84
ENSMUSG00000039462	Col10a1	4.48295	4.99931	1.47054	3.39964	0.000674747	0.00198734		ENSMUSG00000039462	Col10a1	4.48295	4.78298	1.47054	3.25253	0.00114383	0.0418928		ENSMUSG00000039462	0	0	0	5	7	4	0	0	0	0	0	1	14	6	17	7	13	9
ENSMUSG00000039676	Capsl	219.961	-1.21262	0.363265	-3.33813	0.000843454	0.00243097		ENSMUSG00000039676	Capsl	219.961	1.4577	0.377311	3.86338	0.000111829	0.00883235		ENSMUSG00000039676	594	349	327.071	159	128	217	31	59	87	429.998	381.819	345	125	170	141	158	179	108.702
ENSMUSG00000039740	Alg2	1263.17	0.384231	0.1176	3.26727	0.0010859	0.0030617		ENSMUSG00000039740	Alg2	1263.17	-0.39197	0.116601	-3.36162	0.000774855	0.0331102		ENSMUSG00000039740	822.994	1068.13	1105.17	1214.4	1277	1054	1365.72	1515.64	1577.32	978.835	997.058	1235.13	1253.48	1377.41	1237	1259	1515.44	1885.9
ENSMUSG00000039745	Htatip2	226.194	1.69309	0.268024	6.31692	2.6683e-10	2.06827e-09		ENSMUSG00000039745	Htatip2	226.194	0.93715	0.264444	3.54385	0.000394327	0.0213735		ENSMUSG00000039745	111	135.16	106.077	248.478	326	457	143.004	191	183	67.999	77	134	266.996	331	255.386	284	392.023	355.243
ENSMUSG00000039774	Galnt12	848.43	1.3724	0.252061	5.44471	5.18893e-08	3.0907e-07		ENSMUSG00000039774	Galnt12	848.43	0.855813	0.251404	3.40414	0.000663729	0.0300572		ENSMUSG00000039774	427	545.593	412.975	1174.13	853.028	1279.8	410.302	717.902	639	397	512.293	403.085	1278.37	855.976	1140.49	1194	1815.19	1282.01
ENSMUSG00000039887	Alg14	823.231	1.83871	0.169661	10.8375	2.28527e-27	8.31773e-26		ENSMUSG00000039887	Alg14	823.231	0.576091	0.166801	3.45377	0.000552815	0.0263973		ENSMUSG00000039887	409.003	361	334.304	1254.57	1028	1108.03	617.205	872.004	787.639	356	392.999	408	1093.36	1193.51	1168.61	949.211	1049.07	1161.88
ENSMUSG00000040147	Maob	465.987	-1.4323	0.378187	-3.78728	0.000152308	0.000515445		ENSMUSG00000040147	Maob	465.987	-1.49356	0.378354	-3.94753	7.8961e-05	0.00685357		ENSMUSG00000040147	931	588.002	641.679	326	244	186	993.982	428	486	729.915	524.995	758	304.498	163.103	305	149	186.946	341.301
ENSMUSG00000040181	Fmo1	1464.81	-3.67079	0.240787	-15.245	1.77785e-52	2.75149e-50		ENSMUSG00000040181	Fmo1	1464.81	-1.10042	0.242676	-4.5345	5.77397e-06	0.000962777		ENSMUSG00000040181	3200.12	4448.86	4120.67	261.649	300.772	252.803	796.972	403.218	655.99	3257.08	3446.52	3980.98	275.418	306.798	268.691	311.207	390.541	448.941
ENSMUSG00000040205	Cuzd1	200.511	4.68575	0.999398	4.68857	2.75115e-06	1.26228e-05		ENSMUSG00000040205	Cuzd1	200.511	-5.48823	0.548294	-10.0097	1.38236e-23	2.3037e-19		ENSMUSG00000040205	1	2	0	30	19	22	1643.57	490	751.012	1	0	0	11	8	18	47	39.001	156.057
ENSMUSG00000040289	Hey1	430.1	0.832843	0.296998	2.8042	0.00504412	0.0122218		ENSMUSG00000040289	Hey1	430.1	-1.20735	0.293475	-4.11398	3.88898e-05	0.00423594		ENSMUSG00000040289	180.994	365.147	198.183	547.002	297	365	1017.02	739	912.469	150.012	261.001	341	393.642	288	402.001	263.999	350.999	560.794
ENSMUSG00000040387	Klhl32	338.81	1.63266	0.246618	6.6202	3.58721e-11	3.0843e-10		ENSMUSG00000040387	Klhl32	338.81	-0.892036	0.239698	-3.7215	0.000198044	0.0133701		ENSMUSG00000040387	161	139.023	148.64	350.087	366	234.052	475.022	609	558	162.053	120	180.001	329.002	367	388.34	297.999	275	417.987
ENSMUSG00000040412	5330417C22Rik	874.191	-3.67229	0.331317	-11.0839	1.50147e-28	5.89609e-27		ENSMUSG00000040412	5330417C22Rik	874.191	-2.04278	0.333313	-6.12873	8.8582e-10	6.71009e-07		ENSMUSG00000040412	2169.34	2363	2126.54	133	156	87	642.213	199.67	431.998	2513.99	4071.92	2079.78	119	154	147.013	117	165.313	203.008
ENSMUSG00000040938	Slc16a11	210.162	-1.76371	0.656665	-2.68586	0.00723435	0.0168268		ENSMUSG00000040938	Slc16a11	210.162	2.31647	0.672757	3.44325	0.000574758	0.0271341		ENSMUSG00000040938	717.995	347.999	334.413	43	147.001	214.999	16	34	45	204.999	691.068	362.99	51.001	104	34.999	105.001	41.999	25
ENSMUSG00000041064	Pif1	100.247	3.97713	0.595881	6.67437	2.48297e-11	2.1724e-10		ENSMUSG00000041064	Pif1	100.247	2.11557	0.568245	3.72299	0.000196874	0.0133701		ENSMUSG00000041064	19	11	11	233	136	174.999	20	68.999	30	25	8	18	223.1	95.001	180.996	120.001	228.999	73.023
ENSMUSG00000041096	Tspyl2	1947.06	-0.876681	0.106693	-8.21688	2.08857e-16	3.03593e-15		ENSMUSG00000041096	Tspyl2	1947.06	-0.611464	0.107285	-5.69941	1.20222e-08	6.29496e-06		ENSMUSG00000041096	2457.9	3223.35	2761.28	1360.48	1472	1415.55	1814.41	1810.8	1943.01	2061	2285.17	2967.56	1299.38	1472.52	1438.8	1505.52	1943.43	2034.6
ENSMUSG00000041193	Pla2g5	283.762	-3.43388	0.277928	-12.3553	4.56269e-35	2.7733e-33		ENSMUSG00000041193	Pla2g5	283.762	1.24555	0.311809	3.99458	6.48094e-05	0.00603845		ENSMUSG00000041193	825	1097.87	867.998	26	50	42.001	32	28	42	816.275	1082.46	854.933	21	15	32	23	41	27
ENSMUSG00000041423	Paqr6	65.257	-2.56315	0.312772	-8.19495	2.50704e-16	3.6072e-15		ENSMUSG00000041423	Paqr6	65.257	1.32205	0.406691	3.25074	0.00115104	0.0418928		ENSMUSG00000041423	169	184.001	149.966	32	23	28	13	3	13	137.001	145.003	188.005	25.001	33	15	13	28	26.012
ENSMUSG00000041565	L3mbtl4	10.9423	-4.18791	1.22657	-3.41433	0.000639395	0.00189017		ENSMUSG00000041565	L3mbtl4	10.9423	-5.46941	1.21708	-4.49389	6.99347e-06	0.00114261		ENSMUSG00000041565	22.001	13	13	1	1	0	47.999	12	43.999	12	11	12	2	1	1	1	2	5
ENSMUSG00000041608	Entpd3	211.517	-1.88615	0.408332	-4.61916	3.8529e-06	1.72649e-05		ENSMUSG00000041608	Entpd3	211.517	-1.32406	0.409749	-3.23139	0.00123191	0.0435877		ENSMUSG00000041608	505.021	340.997	264.997	105	76	104	296.524	92	293	419	359	256	100.001	82	120	70	133.069	104.779
ENSMUSG00000041827	Oasl1	504.395	3.6337	0.288098	12.6127	1.79706e-36	1.19052e-34		ENSMUSG00000041827	Oasl1	504.395	1.36985	0.275071	4.97999	6.35877e-07	0.000160559		ENSMUSG00000041827	79	66	68	781	529.064	853	285.001	318	269.13	51	108	57	906.697	679.626	727.838	915.38	1268.7	1111.62
ENSMUSG00000041891	Lman1	3422.42	0.820958	0.127512	6.43827	1.20846e-10	9.79583e-10		ENSMUSG00000041891	Lman1	3422.42	-0.535597	0.126811	-4.22359	2.40446e-05	0.00300844		ENSMUSG00000041891	1757.59	2257.18	2310.28	4295.76	3658.9	2309.83	4487.68	4462.44	4583.95	2214.11	2337.75	2615.74	3941.77	3931.22	3788.37	3474.17	4193.24	4516
ENSMUSG00000042215	Bag2	853.538	0.952912	0.125484	7.59388	3.10454e-14	3.70793e-13		ENSMUSG00000042215	Bag2	853.538	-0.437341	0.122193	-3.5791	0.000344779	0.0194007		ENSMUSG00000042215	402.815	543.023	521.246	1061.55	925.276	747	1057.44	1105.29	1200	377	469.783	644.003	1043.13	1072.77	977	945.903	1064	1209.1
ENSMUSG00000042216	Sgsm1	1511.52	4.10294	0.230502	17.8	7.06278e-71	2.76756e-68		ENSMUSG00000042216	Sgsm1	1511.52	0.779175	0.22318	3.49123	0.000480795	0.0241339		ENSMUSG00000042216	140.019	273	136.008	2698.02	1801.07	2144.3	1074.37	1195.11	1489	147	316.502	218	2753.24	2265.78	2471.48	1732.95	2405.54	2182.44
ENSMUSG00000042734	Ttc9	916.892	3.58289	0.223962	15.9978	1.32388e-57	2.59381e-55		ENSMUSG00000042734	Ttc9	916.892	0.705557	0.214604	3.28771	0.00101005	0.0388743		ENSMUSG00000042734	136	168	118.229	1318.21	1248	1502	545.455	807.261	1059	141	244	186	1431.73	1448	1217.67	1378	1462.46	1451.49
ENSMUSG00000043165	Lor	43.4511	2.58513	0.608342	4.24947	2.14282e-05	8.45239e-05		ENSMUSG00000043165	Lor	43.4511	2.37507	0.608682	3.90198	9.54095e-05	0.00783251		ENSMUSG00000043165	18	9	32	41	122	169	12	28	20	11	11	18	38	122	47	30	30	15
ENSMUSG00000043924	Ncmap	22.7733	1.32039	0.457833	2.88399	0.00392667	0.00977792		ENSMUSG00000043924	Ncmap	22.7733	1.64196	0.458193	3.58356	0.000338941	0.0191473		ENSMUSG00000043924	14	12	14	19.999	24	34	7	16	18	20	13.55	20	29	31	22	30	32	33.999
ENSMUSG00000043932	Klri2	22.9844	-2.38495	0.529016	-4.50827	6.53575e-06	2.81433e-05		ENSMUSG00000043932	Klri2	22.9844	-1.87661	0.541003	-3.46876	0.000522861	0.025536		ENSMUSG00000043932	36	31	51	10	4	6	22	31	15	54	31	39	10	11	11	13	17	29
ENSMUSG00000043998	Mgat2	2088.41	1.59203	0.147699	10.7789	4.33133e-27	1.55497e-25		ENSMUSG00000043998	Mgat2	2088.41	-0.517314	0.145558	-3.554	0.000379413	0.020836		ENSMUSG00000043998	567.08	989.989	910.796	2790.39	2422	1510.31	2866.59	2921.55	3138.94	831	930.016	1108.01	2648.66	2403.27	2638.93	2427.61	3059.3	3066.45
ENSMUSG00000044252	Osbpl1a	1472.51	1.67813	0.114147	14.7015	6.30531e-49	8.00861e-47		ENSMUSG00000044252	Osbpl1a	1472.51	0.511308	0.112196	4.55727	5.18226e-06	0.000881248		ENSMUSG00000044252	678.015	740.622	750.291	2441	1807	1929.91	1214.71	1262.13	1552.11	677.002	750.485	814.004	2279.08	2003.28	2328.11	1434.18	1686.41	1741.28
ENSMUSG00000044468	Tent5c	213.184	-1.29169	0.360058	-3.58745	0.000333929	0.00105579		ENSMUSG00000044468	Tent5c	213.184	-1.71444	0.359544	-4.76838	1.8571e-06	0.000359866		ENSMUSG00000044468	228	352.068	302.061	114	162	80	403.984	155	460.178	189	161.928	349.217	104	137.048	138.995	109	140.097	189.039
ENSMUSG00000044548	Dact1	239.994	-0.900271	0.309906	-2.90498	0.00367271	0.00921279		ENSMUSG00000044548	Dact1	239.994	-1.13418	0.309864	-3.66025	0.000251972	0.015727		ENSMUSG00000044548	213.001	435.04	328.675	156	183	119	263.131	210.303	504	156	314	430.991	171	183	161	163	183.274	202.064
ENSMUSG00000045251	Zfp688	256.413	-0.829976	0.225584	-3.67923	0.00023394	0.000761752		ENSMUSG00000045251	Zfp688	256.413	0.85189	0.232668	3.66139	0.00025085	0.0157158		ENSMUSG00000045251	386.185	520.078	459.007	194	171	219	136	139	157.077	268.999	456.357	466.001	143	181.999	174.007	158.999	228.992	231.755
ENSMUSG00000045259	Klhdc9	28.0998	-1.47805	0.40632	-3.63765	0.000275137	0.000884175		ENSMUSG00000045259	Klhdc9	28.0998	1.6781	0.519418	3.23073	0.00123473	0.0435947		ENSMUSG00000045259	65	59	57.079	23	22	16	6	3	9	38	63	60	15	18	32	5	16	9
ENSMUSG00000045328	Cenpe	485.307	2.68679	0.56864	4.72495	2.30174e-06	1.06806e-05		ENSMUSG00000045328	Cenpe	485.307	1.82278	0.566844	3.21566	0.00130145	0.0450907		ENSMUSG00000045328	212	98	124	1071.63	593.001	639.76	133.007	575	167	246	97.049	189	910.279	515.701	828	759	1203.29	382
ENSMUSG00000045625	Pigz	63.9736	-2.80109	0.470601	-5.95217	2.64617e-09	1.84513e-08		ENSMUSG00000045625	Pigz	63.9736	1.85419	0.563306	3.29163	0.000996096	0.0385149		ENSMUSG00000045625	214.001	102.999	81.01	31	26	22	2	4	15	122.066	149.001	98.036	38	17	25	18	50.15	19
ENSMUSG00000045994	B3gat1	59.0847	-5.13508	0.586727	-8.75209	2.09444e-18	3.65971e-17		ENSMUSG00000045994	B3gat1	59.0847	-4.01329	0.592599	-6.77237	1.26692e-11	1.31958e-08		ENSMUSG00000045994	87	161	153.999	4	6	2	58	25	88	112.174	138	172	3	5	2	2	6	11
ENSMUSG00000046402	Rbp1	1624.45	0.835473	0.372097	2.24531	0.0247484	0.0494834		ENSMUSG00000046402	Rbp1	1624.45	1.23648	0.372427	3.32006	0.000899995	0.0367608		ENSMUSG00000046402	1706.47	1243.35	1268.21	1214.6	1757	3829.91	700.443	1040.11	1129.45	1307.72	814.263	1399.58	1480.11	1913.01	1654.28	1956.18	2565.16	2011.01
ENSMUSG00000046727	Cystm1	1821.63	2.15824	0.268909	8.02591	1.00777e-15	1.37279e-14		ENSMUSG00000046727	Cystm1	1821.63	0.865966	0.267867	3.23282	0.00122573	0.0434611		ENSMUSG00000046727	768.001	666.999	589.452	2889.3	2081.01	3497.9	1225.02	1481.59	1834	598.031	835.594	525.705	3019.5	2121.45	3029.86	2062.8	2815.31	2650.61
ENSMUSG00000046733	Gprc5a	424.71	1.90869	0.36284	5.26042	1.43723e-07	8.05768e-07		ENSMUSG00000046733	Gprc5a	424.71	1.58931	0.362392	4.3856	1.15666e-05	0.00169085		ENSMUSG00000046733	245	171	152.045	473.146	683	817	129	267.028	244	206.999	383	184.011	553.864	676.446	436.994	665	759.994	569.159
ENSMUSG00000046971	Pla2g4f	52.4514	4.17566	0.67017	6.23075	4.64203e-10	3.51386e-09		ENSMUSG00000046971	Pla2g4f	52.4514	3.18167	0.636897	4.99558	5.86595e-07	0.000150394		ENSMUSG00000046971	6	6	7	39.059	146	109	8	19	5	6	6	1	61	139	77	140.96	83	75
ENSMUSG00000047230	Cldn2	176.35	2.6018	0.582861	4.46384	8.05054e-06	3.41e-05		ENSMUSG00000047230	Cldn2	176.35	2.08898	0.575139	3.63214	0.00028108	0.0166698		ENSMUSG00000047230	5	49	76	252	304.999	260	66	59	80	16.195	20	87	175.001	494	247.028	304	523.994	400
ENSMUSG00000047730	Fcgbp	13563.2	3.39132	0.353298	9.59906	8.06778e-22	1.88559e-20		ENSMUSG00000047730	Fcgbp	13563.2	1.75403	0.352705	4.97307	6.59005e-07	0.000163915		ENSMUSG00000047730	1116.15	1718.85	2017.84	25193.6	23064.1	19236.6	9151	12705.8	12921.4	1759.56	3334.73	2353.92	23276.4	31896.8	25396.3	20806.9	27062	22558.3
ENSMUSG00000047810	Ccdc88b	428.321	2.81618	0.316784	8.88988	6.11723e-19	1.12774e-17		ENSMUSG00000047810	Ccdc88b	428.321	1.121	0.310242	3.61331	0.000302319	0.0177399		ENSMUSG00000047810	89	154	88	792.046	446	691	225.129	432.993	256	75	84.4	156	472.274	710.294	428.157	592.451	1121.01	951.165
ENSMUSG00000048329	Mfsd6l	100.067	1.29514	0.244253	5.30248	1.14242e-07	6.48779e-07		ENSMUSG00000048329	Mfsd6l	100.067	0.762749	0.239394	3.18617	0.00144171	0.0476707		ENSMUSG00000048329	65	55.995	69	152	113	167.072	77.971	72.003	94	50	73	66	112.937	125	137	92	128	151.335
ENSMUSG00000048794	Cfap100	41.6652	1.2797	0.433198	2.95408	0.00313603	0.00800791		ENSMUSG00000048794	Cfap100	41.6652	1.43092	0.438808	3.26093	0.00111047	0.041206		ENSMUSG00000048794	38.029	34	28	46	46	61	27	33.001	21	25	22	44.001	46	33	53	49	45	59.001
ENSMUSG00000048992	Prss32	77.7227	7.30911	1.1416	6.4025	1.52853e-10	1.22502e-09		ENSMUSG00000048992	Prss32	77.7227	1.77861	0.534491	3.32767	0.000875746	0.0363042		ENSMUSG00000048992	0	1	1	82	82	175	13	65	19	0	0	0	111	108	82	200	268	234.693
ENSMUSG00000049307	Fut4	163.663	0.933363	0.28067	3.32548	0.000882668	0.00253092		ENSMUSG00000049307	Fut4	163.663	-0.896345	0.270407	-3.3148	0.000917074	0.0370049		ENSMUSG00000049307	35	124	99.459	174	165	107.952	249.078	216.011	312	58	92	94	178.989	199	176	183	207	269
ENSMUSG00000049409	Prokr1	30.1074	-0.952104	0.412592	-2.30762	0.0210205	0.0429504		ENSMUSG00000049409	Prokr1	30.1074	-1.31481	0.410524	-3.20276	0.00136116	0.046483		ENSMUSG00000049409	26	50	32	20	19	11	42	48	25	27	22.003	43	30	24	16	29.001	37	44.975
ENSMUSG00000049553	Polr1a	1464.91	0.408006	0.0871171	4.68341	2.82137e-06	1.29289e-05		ENSMUSG00000049553	Polr1a	1464.91	-0.383972	0.0858912	-4.47045	7.80559e-06	0.00126291		ENSMUSG00000049553	872.965	1387.41	1232.87	1689	1405	1058	1660.83	1688.71	1881	1004.99	1206.33	1493.43	1637.94	1632.1	1653.99	1411.01	1725.9	1753.09
ENSMUSG00000050092	Sprr2b	698.935	10.2423	0.838598	12.2136	2.63035e-34	1.49516e-32		ENSMUSG00000050092	Sprr2b	698.935	2.06642	0.422225	4.89412	9.87467e-07	0.000216491		ENSMUSG00000050092	0	3	1	1150.04	927.001	2204.57	153	395.998	459.998	0	3	1	1800.69	972.813	1798.03	642.717	980.901	981.346
ENSMUSG00000050195	Scd4	49.9748	-0.804084	0.304561	-2.64014	0.00828713	0.0189878		ENSMUSG00000050195	Scd4	49.9748	-1.05667	0.305679	-3.45679	0.00054665	0.0262534		ENSMUSG00000050195	66.942	75.87	46.094	31.083	36.485	34.849	46.009	59.137	72.897	56.815	59.006	77.859	36.056	46.023	20.039	36.973	47.983	48.978
ENSMUSG00000050241	Klre1	32.3919	-2.43788	0.457464	-5.32912	9.86923e-08	5.64477e-07		ENSMUSG00000050241	Klre1	32.3919	-1.55904	0.471938	-3.3035	0.000954871	0.0377083		ENSMUSG00000050241	67	57	92	16.999	9	12	39	23	28	53	29	61	15	18	7	16	10	19.001
ENSMUSG00000050761	Gp1bb	10.4775	4.35294	1.48454	2.93218	0.00336593	0.00852334		ENSMUSG00000050761	Gp1bb	10.4775	5.8561	1.71677	3.41111	0.000646999	0.0297852		ENSMUSG00000050761	2.068	0	3.62	5.204	12.623	87.127	0	0	2.261	0	0	0	12.978	0	9.362	5.126	8.82	23.587
ENSMUSG00000051359	Ncald	892.904	-1.25443	0.200595	-6.25358	4.01144e-10	3.05916e-09		ENSMUSG00000051359	Ncald	892.904	-0.866493	0.201311	-4.30425	1.67553e-05	0.00228874		ENSMUSG00000051359	1331	1603.05	1443.09	676.991	493.999	487.999	1021.08	682	1003.78	1158	1625.39	1146.24	639	614.384	690	453.011	466.189	638.611
ENSMUSG00000051444	Bbs12	291.209	-1.59869	0.178504	-8.95601	3.36653e-19	6.33313e-18		ENSMUSG00000051444	Bbs12	291.209	-0.594844	0.183627	-3.23941	0.00119778	0.0428347		ENSMUSG00000051444	490.086	600.833	499.413	187.117	167	118	219.151	201	237.015	456	485.236	540.759	148.103	162	224.005	156	250.802	207.344
ENSMUSG00000051451	Crebzf	1955.46	-0.697054	0.0739732	-9.42306	4.38129e-21	9.73344e-20		ENSMUSG00000051451	Crebzf	1955.46	-0.248965	0.0747885	-3.32893	0.000871814	0.0362314		ENSMUSG00000051451	2123.08	2756.96	2558.11	1909.76	1580	1117	1731.12	1596.01	1814.86	2129.46	2421.04	2834.37	1575.79	1706.57	1691.07	1603	2183.08	2078.64
ENSMUSG00000051726	Kcnf1	324.38	2.45607	0.341307	7.19607	6.19739e-13	6.54457e-12		ENSMUSG00000051726	Kcnf1	324.38	-1.49946	0.324254	-4.62434	3.75787e-06	0.000673386		ENSMUSG00000051726	71.992	62	35	323.111	320	231	550.42	660.203	1145.04	23	39	78	315.909	413	280	307	333.218	549.563
ENSMUSG00000051747	Ttn	56.8756	-6.2823	1.25946	-4.98808	6.09815e-07	3.10247e-06		ENSMUSG00000051747	Ttn	56.8756	-7.15344	1.30825	-5.46795	4.55273e-08	1.89678e-05		ENSMUSG00000051747	60	50	60	1	2	1	4	9	5	59.002	58	83	8	6	7	8	3	15
ENSMUSG00000052026	Slc6a7	87.6712	4.63713	0.657943	7.04793	1.81604e-12	1.82566e-11		ENSMUSG00000052026	Slc6a7	87.6712	3.1508	0.618056	5.09792	3.43405e-07	9.69973e-05		ENSMUSG00000052026	5	13	7	178	200	182	4	47	9	3	4	16	161	286	218	95	48	76
ENSMUSG00000052369	Tmem106c	598.168	-1.14276	0.121692	-9.39057	5.96758e-21	1.31623e-19		ENSMUSG00000052369	Tmem106c	598.168	0.435637	0.128349	3.39417	0.000688376	0.0306732		ENSMUSG00000052369	1048.02	1111.23	1036.55	437.002	376.999	465	279.135	278.643	346	822.008	1164.04	1137.65	407.01	378.003	405.863	368	479.413	488.001
ENSMUSG00000052430	Bmpr1b	91.5224	-2.88424	0.426146	-6.76819	1.30404e-11	1.18308e-10		ENSMUSG00000052430	Bmpr1b	91.5224	-1.59829	0.434355	-3.67969	0.00023352	0.0150914		ENSMUSG00000052430	273	176	143	22	29	24	86	40	69	285.738	211	179	18.001	31	29	17	36	34
ENSMUSG00000052854	Nrk	360.353	5.00943	0.454235	11.0283	2.79156e-28	1.07782e-26		ENSMUSG00000052854	Nrk	360.353	-1.21337	0.381352	-3.18176	0.00146384	0.0481163		ENSMUSG00000052854	14	5	14	372.001	450	161	631.892	792.007	672.309	37	6	17	423.255	557.001	329.161	591.015	682.311	730.583
ENSMUSG00000053025	Sv2b	681.413	-0.659786	0.254759	-2.58984	0.00960192	0.0216369		ENSMUSG00000053025	Sv2b	681.413	1.2547	0.259677	4.83178	1.35318e-06	0.000275009		ENSMUSG00000053025	777.409	1064.98	1250.41	668	574.115	389	184	201	267	783.003	1379.75	1472.18	689.178	606.001	696.994	447	776.407	517.261
ENSMUSG00000053062	Jam2	1557.01	-2.17401	0.214154	-10.1516	3.25944e-24	9.37956e-23		ENSMUSG00000053062	Jam2	1557.01	-1.13897	0.214952	-5.29872	1.16615e-07	4.13486e-05		ENSMUSG00000053062	1845	4223.46	3173.32	673.701	728.071	332.999	1171.39	1156.98	1308	2640.4	3683.8	3057.25	690	751.567	734	873.851	920.258	1177.05
ENSMUSG00000053091	Lins1	355.198	-0.815143	0.149713	-5.44471	5.1889e-08	3.0907e-07		ENSMUSG00000053091	Lins1	355.198	-0.504392	0.152832	-3.30031	0.000965785	0.0378701		ENSMUSG00000053091	446.314	516.717	519	276.001	285.001	222.044	284.169	289.999	311	403.999	494	609.028	290.273	317.007	314.002	266	293.986	320.13
ENSMUSG00000053182	Gm609	166.813	-6.70583	0.583274	-11.4969	1.36774e-30	6.17392e-29		ENSMUSG00000053182	Gm609	166.813	-2.15834	0.623774	-3.46013	0.000539918	0.026005		ENSMUSG00000053182	301.694	430.719	386.223	7.003	4.227	0	10.969	20.87	7.923	661.561	699.68	439.426	12.389	7.02	8.016	9.109	27	15
ENSMUSG00000053647	Gper1	175.25	-2.23601	0.42103	-5.31081	1.0914e-07	6.21145e-07		ENSMUSG00000053647	Gper1	175.25	1.88969	0.462601	4.08492	4.40916e-05	0.00468017		ENSMUSG00000053647	450	343.21	255	71	73	66	12	24	18	497	497.008	351.116	156	40.033	99	55	105	60
ENSMUSG00000053754	Chd8	3296.19	-0.758441	0.120299	-6.30465	2.88842e-10	2.22857e-09		ENSMUSG00000053754	Chd8	3296.19	-0.400592	0.12044	-3.32608	0.000880761	0.0364077		ENSMUSG00000053754	2861.98	4344.91	3664.7	3454.59	2837.5	1779.45	2818.3	3035.18	3137.96	3280.52	3870.08	4213.03	3247.49	3496.57	3298.91	2764.45	3406.66	3669.39
ENSMUSG00000053846	Lipg	589.02	0.804182	0.30913	2.60144	0.00928335	0.0210194		ENSMUSG00000053846	Lipg	589.02	-1.12076	0.30646	-3.65712	0.000255069	0.0157794		ENSMUSG00000053846	191	302	406.251	521.897	657.925	290	842.33	652.999	1502.93	359	436.051	466	537.77	759	436.001	678.084	670.262	837.051
ENSMUSG00000054203	Ifi205	366.316	0.95972	0.295275	3.25026	0.00115299	0.00323314		ENSMUSG00000054203	Ifi205	366.316	-1.32444	0.290279	-4.56265	5.05116e-06	0.000867811		ENSMUSG00000054203	151.712	225.838	162.384	347.08	276.511	283.046	827.062	499.457	789.885	184.946	88.761	124.44	352.653	299.115	335.504	316.816	432.551	706.22
ENSMUSG00000054342	Kcnn4	669.048	3.33597	0.285627	11.6795	1.62315e-31	7.68472e-30		ENSMUSG00000054342	Kcnn4	669.048	1.17165	0.278298	4.21006	2.55301e-05	0.00308751		ENSMUSG00000054342	120	160.001	95	1099.33	775.221	1337.43	303.31	625.071	474.999	99	125	145	1060.58	854.82	940.985	976.997	1542.74	1197.45
ENSMUSG00000054435	Gimap4	515.834	-1.33959	0.157166	-8.52337	1.54975e-17	2.52582e-16		ENSMUSG00000054435	Gimap4	515.834	-0.844363	0.158743	-5.31904	1.04317e-07	3.77922e-05		ENSMUSG00000054435	632	990.002	792.433	280	326.999	249.001	516	447.924	552.898	738.999	615.97	915.999	297.184	362	369	365.001	466	463.331
ENSMUSG00000054612	Mgmt	110.268	-0.570581	0.243214	-2.34601	0.0189758	0.0392715		ENSMUSG00000054612	Mgmt	110.268	0.954526	0.26005	3.67056	0.000242024	0.0153359		ENSMUSG00000054612	214	161.083	180.031	101	102.58	142	58	52	61	122	136	161.051	84	76	88	67	89	94
ENSMUSG00000054667	Irs4	30.2177	-5.23283	0.735073	-7.11879	1.08882e-12	1.12403e-11		ENSMUSG00000054667	Irs4	30.2177	-2.45279	0.76946	-3.18768	0.00143417	0.0476707		ENSMUSG00000054667	51	152.035	89	5	2	0	6	7	23	65	72	65	2	3	6	9	6	8
ENSMUSG00000054715	Zscan22	430.747	-1.17607	0.216439	-5.43371	5.51942e-08	3.27907e-07		ENSMUSG00000054715	Zscan22	430.747	-0.856145	0.21759	-3.93466	8.33131e-05	0.0070438		ENSMUSG00000054715	544	670.078	651.962	309	321.009	157.008	373.66	473.56	437.954	496.947	543.124	685.588	359.829	292.85	277.998	329.18	367.084	498.137
ENSMUSG00000054717	Hmgb2	1751.43	0.761472	0.329169	2.31332	0.0207052	0.0423885		ENSMUSG00000054717	Hmgb2	1751.43	1.25464	0.329589	3.80669	0.000140839	0.0104315		ENSMUSG00000054717	1976.91	1310.55	1671.5	2445.7	1658.37	3308.1	735.635	1367.41	933.347	1471.82	1684.44	1544.82	2024.33	1427.19	2234.15	1693.29	2634.78	1207.31
ENSMUSG00000055116	Arntl	411.122	1.31592	0.150624	8.73647	2.40507e-18	4.1866e-17		ENSMUSG00000055116	Arntl	411.122	0.62306	0.147894	4.21289	2.52121e-05	0.00308751		ENSMUSG00000055116	240.201	290.092	210.02	739	524	437	290.97	384.983	362.999	266.048	313.014	366.181	577.595	665.42	567	357.122	391.995	443.954
ENSMUSG00000055368	Slc6a2	601.513	-4.56582	0.391096	-11.6744	1.72213e-31	8.11165e-30		ENSMUSG00000055368	Slc6a2	601.513	-2.17061	0.394138	-5.50724	3.64498e-08	1.59852e-05		ENSMUSG00000055368	1567.86	956.006	1749.16	40	77.017	52	289.03	154.567	281	2152.16	1366.29	1856.86	53	62	23	53.001	73	46
ENSMUSG00000055409	Nell1	103.148	-2.94339	0.38874	-7.57163	3.68569e-14	4.37932e-13		ENSMUSG00000055409	Nell1	103.148	-2.23271	0.391807	-5.69849	1.20875e-08	6.29496e-06		ENSMUSG00000055409	270.002	208	219.895	32	24	22	169.077	66	155.999	138.645	161	206	41	22	50	25	29	40.639
ENSMUSG00000055523	Gucy2g	251.296	-1.38575	0.214734	-6.45332	1.09426e-10	8.91334e-10		ENSMUSG00000055523	Gucy2g	251.296	1.18645	0.231523	5.12454	2.98261e-07	8.73354e-05		ENSMUSG00000055523	535.002	571	502.838	223.001	188	165	64	100	73	207	327	484	209.021	225	226	151	157	222.994
ENSMUSG00000055866	Per2	2313.26	-1.3691	0.357667	-3.82786	0.00012926	0.00044323		ENSMUSG00000055866	Per2	2313.26	-1.31222	0.357734	-3.66815	0.000244315	0.0154224		ENSMUSG00000055866	1232.23	5035.65	4120.36	1464.39	1618	575	2501.05	2655.9	2953.47	1816.1	3363.8	3881.73	1649.64	1250.45	1250.67	1950.4	2177.03	2877.84
ENSMUSG00000056204	Pgpep1	2201.35	1.23792	0.165827	7.46514	8.32136e-14	9.56645e-13		ENSMUSG00000056204	Pgpep1	2201.35	-0.81237	0.164461	-4.9396	7.82821e-07	0.000186323		ENSMUSG00000056204	858.32	1171.07	1161.13	2765.09	1905.22	2642	3515.28	2625	4004.61	926.217	1072.35	1317.99	2171.32	2308.71	2489.81	1882.27	2568.28	3626.55
ENSMUSG00000056293	Gsdmc2	25.6528	3.42112	0.875437	3.9079	9.31028e-05	0.000328671		ENSMUSG00000056293	Gsdmc2	25.6528	2.78565	0.829921	3.35653	0.000789283	0.0333842		ENSMUSG00000056293	5	2	1	33.641	12.999	35.718	0	6.995	5	9.002	2	1	58.886	28.979	39.818	67.607	122.055	39.575
ENSMUSG00000056973	Ces1d	1855.37	-1.75879	0.348313	-5.04945	4.43079e-07	2.30709e-06		ENSMUSG00000056973	Ces1d	1855.37	1.33808	0.350723	3.81519	0.000136076	0.0101237		ENSMUSG00000056973	1909.49	5990.39	3318.3	931.92	886.001	1226.01	245.152	375.257	508.097	1353	4559.13	3988.68	1048.49	958.001	1141.39	1567.61	2744.5	2186.42
ENSMUSG00000057069	Ero1lb	276.398	-0.50923	0.17967	-2.83425	0.00459333	0.0112524		ENSMUSG00000057069	Ero1lb	276.398	-0.73085	0.179857	-4.06351	4.83405e-05	0.00500369		ENSMUSG00000057069	251.269	353.052	358.002	214.005	191.355	166.88	322.078	340.031	256.001	238.648	301.954	370.881	165.948	210.049	176.035	300.266	360.012	450.023
ENSMUSG00000057346	Apol9a	341.219	1.51456	0.297011	5.09935	3.40826e-07	1.80322e-06		ENSMUSG00000057346	Apol9a	341.219	1.44298	0.296462	4.86733	1.13114e-06	0.000238614		ENSMUSG00000057346	143.358	147.491	184.103	423.908	316.509	522.375	159.511	149.173	203.851	103.482	108.461	145.82	490.325	426.251	449.32	608.256	928.921	563.548
ENSMUSG00000058290	Espl1	204.279	1.94636	0.463255	4.20149	2.65165e-05	0.00010266		ENSMUSG00000058290	Espl1	204.279	1.50979	0.454431	3.32238	0.000892534	0.0365457		ENSMUSG00000058290	60	52	52	466.999	276.001	276.001	97.001	292.001	123	123.08	54.001	105.999	434.851	231.932	296.999	326.014	557.3	160.043
ENSMUSG00000058297	Spock2	2119.37	-3.78918	0.502944	-7.534	4.92108e-14	5.78007e-13		ENSMUSG00000058297	Spock2	2119.37	-1.71264	0.503426	-3.40197	0.000669012	0.0301327		ENSMUSG00000058297	1438.43	9135.16	6636.38	537.064	381	215	1778.92	459.915	1131.98	2080	5614.26	7673.74	558.656	384.056	409	407.003	648.665	639.063
ENSMUSG00000058914	C1qtnf3	284.082	-3.46669	0.43351	-7.99681	1.27689e-15	1.72534e-14		ENSMUSG00000058914	C1qtnf3	284.082	-2.34329	0.435552	-5.38003	7.44723e-08	2.82064e-05		ENSMUSG00000058914	521	801.541	565.986	76	62	16	280.424	105	341	704.152	384.95	764	98	87	85	115	172.107	98
ENSMUSG00000059493	Nhs	168.05	-2.03048	0.290431	-6.99128	2.72381e-12	2.68116e-11		ENSMUSG00000059493	Nhs	168.05	-1.0623	0.296059	-3.58814	0.000333043	0.0190261		ENSMUSG00000059493	206	310	321	77.035	83	25	105	144.19	108	393	332.981	437	83.005	116	83	72	104	111
ENSMUSG00000060519	Tor3a	665.282	0.258235	0.107949	2.39219	0.0167481	0.0352071		ENSMUSG00000060519	Tor3a	665.282	0.432884	0.109898	3.93897	8.18325e-05	0.00702958		ENSMUSG00000060519	636.994	767.029	701.318	667.008	683	750.598	447.482	475	554.325	525.087	643.334	726	782.317	771.981	755.352	603.711	783.633	747.593
ENSMUSG00000061144	Spink12	59.0262	4.6772	0.823104	5.6824	1.32821e-08	8.55301e-08		ENSMUSG00000061144	Spink12	59.0262	2.94927	0.776093	3.80015	0.000144611	0.0105699		ENSMUSG00000061144	6	11	1	54	167	164	16	27	4	10	4	10	42	181	27	134	112.157	61.041
ENSMUSG00000061259	Tmprss11d	942.135	7.93724	0.494979	16.0355	7.21852e-58	1.44504e-55		ENSMUSG00000061259	Tmprss11d	942.135	1.4007	0.376863	3.71673	0.000201816	0.0135071		ENSMUSG00000061259	7	8	5	1207	1604	1396.62	199.138	852.487	491.23	12	10	3	1851.49	1853.77	1753.3	1669.47	1768.25	2023.55
ENSMUSG00000061718	Ppp1r1b	180.91	1.41976	0.350786	4.04736	5.17979e-05	0.000190678		ENSMUSG00000061718	Ppp1r1b	180.91	1.10794	0.349486	3.1702	0.00152336	0.0493217		ENSMUSG00000061718	76.001	119.971	101	181	167	329.132	90.055	130	118	72	87	182	169	255.002	200.999	264.004	404.001	312
ENSMUSG00000061877	BC048679	330.371	-2.7121	0.623949	-4.34667	1.3822e-05	5.62438e-05		ENSMUSG00000061877	BC048679	330.371	2.5986	0.652471	3.9827	6.81372e-05	0.00627351		ENSMUSG00000061877	1385	342	651.801	53	62	219	19	14	23.001	1273.83	262.001	845.006	62.999	102	111	106	191.051	123.572
ENSMUSG00000061959	Ces1e	342.581	-1.09892	0.239807	-4.58253	4.5938e-06	2.02936e-05		ENSMUSG00000061959	Ces1e	342.581	0.797835	0.248671	3.2084	0.00133476	0.0458636		ENSMUSG00000061959	693.965	563.036	467.048	197	202	287.001	88	109.001	194.197	466	623	529.999	220.136	241.454	287.999	288.001	424	452.269
ENSMUSG00000062070	Pgk1	7494.18	2.39338	0.223115	10.7271	7.59052e-27	2.66784e-25		ENSMUSG00000062070	Pgk1	7494.18	0.854628	0.222734	3.83699	0.000124554	0.00952153		ENSMUSG00000062070	2568.36	2578.72	2259.32	10696.3	8856.18	16065.3	4796.93	7385.21	6575.44	1784.13	2433.28	2486.79	11707.5	9949.81	10517.6	9243.03	11866.4	12419.8
ENSMUSG00000062310	Glrp1	58.829	1.0592	0.361983	2.9261	0.00343245	0.00867509		ENSMUSG00000062310	Glrp1	58.829	1.46067	0.374749	3.89773	9.70996e-05	0.00793218		ENSMUSG00000062310	56	31	32.01	96	62	73	21	24	34	54	26	55	76	111	120	56	64	74.003
ENSMUSG00000062393	Dgkk	17.4202	2.39333	0.60437	3.96004	7.49371e-05	0.000268662		ENSMUSG00000062393	Dgkk	17.4202	1.92038	0.587105	3.27093	0.00107195	0.0400424		ENSMUSG00000062393	3	11	3	23	38	21	4	7	9	10	6	7	18	48	30	31	23	25
ENSMUSG00000062444	Ap3b2	623.838	-4.23373	0.381319	-11.1029	1.21488e-28	4.81171e-27		ENSMUSG00000062444	Ap3b2	623.838	1.42816	0.408147	3.49914	0.000466765	0.0237429		ENSMUSG00000062444	1632.88	1201.92	1231.78	66	58	69	30	27	39	2003.59	1456.19	1707.33	71	116.258	110	136.481	208.019	117.999
ENSMUSG00000062524	Ncr1	29.5609	-2.7893	0.659425	-4.22989	2.33806e-05	9.17146e-05		ENSMUSG00000062524	Ncr1	29.5609	-2.47502	0.663598	-3.72969	0.000191712	0.0131202		ENSMUSG00000062524	51	46	75.537	9	12	2	36	58	24	56.362	25	54	5	15	17	14	5	29
ENSMUSG00000062785	Kcnc3	135.875	0.990554	0.32754	3.02422	0.00249275	0.00650547		ENSMUSG00000062785	Kcnc3	135.875	-1.1535	0.313883	-3.67493	0.000237911	0.0151907		ENSMUSG00000062785	51	79	43	181.001	102	62.999	197	226.001	204.001	87.999	49	79	112	138.001	122.001	176.001	228.082	262.263
ENSMUSG00000062908	Acadm	1818.46	-0.427995	0.0964801	-4.4361	9.16053e-06	3.84129e-05		ENSMUSG00000062908	Acadm	1818.46	0.329975	0.0978934	3.37076	0.000749614	0.0325321		ENSMUSG00000062908	2437.31	2556.83	2225.92	1734.01	1645.5	1733.05	1207.96	1185.75	1311.04	1768.62	2389.76	2487.16	1585.32	1719.31	1700	1512	1724.43	2027.1
ENSMUSG00000062991	Nrg1	606.043	2.85893	0.3477	8.22238	1.99502e-16	2.90913e-15		ENSMUSG00000062991	Nrg1	606.043	-1.23206	0.337878	-3.64646	0.000265881	0.0161712		ENSMUSG00000062991	77	103	111	657.002	881.001	324.999	1180.13	1806.87	1109.06	150.479	103.001	150	698.309	1012	779.001	465.999	327	795.993
ENSMUSG00000063171	Rps4l	532.436	1.2551	0.260289	4.82196	1.42158e-06	6.81094e-06		ENSMUSG00000063171	Rps4l	532.436	0.868853	0.259785	3.34451	0.000824291	0.0346015		ENSMUSG00000063171	291	425.478	438.116	741.057	569	1147	391.011	442	500	266	408.517	376	650.741	542	598.006	474.756	585.167	646.663
ENSMUSG00000063177	Klk1b27	18.3707	6.05207	1.33682	4.5272	5.97704e-06	2.58827e-05		ENSMUSG00000063177	Klk1b27	18.3707	-2.61318	0.640563	-4.0795	4.51325e-05	0.00474297		ENSMUSG00000063177	0	0	0	15	9.485	10	90.42	29.631	72.002	1	0	0	14	17	25	12	11	3.035
ENSMUSG00000063229	Ldha	16688.5	2.37712	0.205152	11.5871	4.79053e-31	2.21121e-29		ENSMUSG00000063229	Ldha	16688.5	0.774492	0.204958	3.77878	0.000157601	0.0111763		ENSMUSG00000063229	5572.24	5991.82	4748.63	23077.1	20249.9	33948.2	11190.4	15825.4	16269.3	4735.38	5905.56	5694.95	24760.1	22635.7	24396.3	21104.7	26904.7	25686.8
ENSMUSG00000063524	Eno1	16441.3	2.13463	0.191489	11.1475	7.36069e-29	2.99916e-27		ENSMUSG00000063524	Eno1	16441.3	0.802482	0.191324	4.19437	2.73631e-05	0.00328062		ENSMUSG00000063524	6568.77	6436.51	5393.49	24686.8	21859.7	29302.3	10353.7	16940.5	14621.1	4558.05	5466.18	6101.35	25648.6	23659.9	24352.8	20412	24761	25115.3
ENSMUSG00000063713	Klk1b24	90.9606	2.74303	0.408923	6.70793	1.97403e-11	1.75208e-10		ENSMUSG00000063713	Klk1b24	90.9606	-1.20777	0.354327	-3.40863	0.00065291	0.0298016		ENSMUSG00000063713	7	19	21	103	70.515	113	269.009	129.389	224	6	8	12	102	81.023	143.606	89.002	97.838	84.999
ENSMUSG00000063727	Tnfrsf11b	62.2815	-1.53621	0.328484	-4.67667	2.91577e-06	1.33349e-05		ENSMUSG00000063727	Tnfrsf11b	62.2815	-1.14774	0.334071	-3.43561	0.000591212	0.0276757		ENSMUSG00000063727	78	127	104	35	42	19	77.049	53	67	87	53	118	48	49	47	43	47	39
ENSMUSG00000063779	Chil4	47.77	7.48794	1.26798	5.90541	3.51768e-09	2.42006e-08		ENSMUSG00000063779	Chil4	47.77	-2.57103	0.473618	-5.42849	5.6834e-08	2.31009e-05		ENSMUSG00000063779	0	0	0	30.096	32.996	29.158	171.269	119.036	220.291	0	0	0	54	12	42	28.118	36.587	35.08
ENSMUSG00000063838	Cdc42ep5	797.888	1.04808	0.234164	4.47582	7.61169e-06	3.24051e-05		ENSMUSG00000063838	Cdc42ep5	797.888	0.870938	0.234038	3.72135	0.000198164	0.0133701		ENSMUSG00000063838	519.288	617	608	984	899	1457.7	481.781	650.339	700	563	731.997	640.024	1066.73	853.708	878	748.658	890.112	1012.64
ENSMUSG00000063903	Klk1	1642.73	6.80269	0.43419	15.6675	2.52171e-55	4.34041e-53		ENSMUSG00000063903	Klk1	1642.73	-1.36314	0.384294	-3.54714	0.00038944	0.0212092		ENSMUSG00000063903	22.999	8	18	1635.63	1522.99	2227.34	6248.52	2358.78	4450.01	6	14	8	1570.13	1224.58	2382.65	1688.69	2360.13	1849.93
ENSMUSG00000064057	Scgb3a1	175.532	8.12834	0.802255	10.1319	3.98945e-24	1.13913e-22		ENSMUSG00000064057	Scgb3a1	175.532	3.13538	0.4944	6.3418	2.271e-10	1.89231e-07		ENSMUSG00000064057	2	1	2	231	239	815	40	44	58	0	0	1	186	375.098	281	254	350.025	253
ENSMUSG00000064215	Ifi27	2554.92	-0.51605	0.193967	-2.6605	0.00780244	0.0180072		ENSMUSG00000064215	Ifi27	2554.92	0.640053	0.194517	3.29047	0.0010002	0.0385839		ENSMUSG00000064215	3648.02	3352.94	3454.99	2662.26	2156	3232.9	1651.55	1562.09	1853.13	2129.91	2311.44	3281.21	2148.59	2327.82	2342.14	2155	2583.34	2548.56
ENSMUSG00000067591	Klra3	11.6091	-2.87	0.785679	-3.65289	0.00025931	0.000837992		ENSMUSG00000067591	Klra3	11.6091	-2.60267	0.795468	-3.27187	0.00106838	0.0400101		ENSMUSG00000067591	18	17.001	27	4	1	2	13.997	13	16	35.474	9	22.002	4	2	4	6	8.001	11
ENSMUSG00000067613	Krt83	142.283	3.88522	0.385981	10.0658	7.82163e-24	2.18259e-22		ENSMUSG00000067613	Krt83	142.283	-1.21889	0.263387	-4.62776	3.69637e-06	0.000669566		ENSMUSG00000067613	5	13.022	8	171.742	232.17	141.086	349.132	406.62	462.937	8	5.79	5	142.454	224.076	165.506	122.275	183.802	280.644
ENSMUSG00000067750	Khdc1a	174.706	5.15947	0.51085	10.0998	5.53623e-24	1.55665e-22		ENSMUSG00000067750	Khdc1a	174.706	1.46887	0.443821	3.3096	0.000934306	0.0374284		ENSMUSG00000067750	10.495	3	15.778	331.362	304.594	310.288	70.543	113.586	137.264	8.945	4.997	19.797	175.704	573.529	207.349	223.827	351.255	270.316
ENSMUSG00000068011	Mkrn2os	310.647	7.38338	0.618033	11.9466	6.76546e-33	3.4611e-31		ENSMUSG00000068011	Mkrn2os	310.647	1.46652	0.297172	4.93493	8.0181e-07	0.000186323		ENSMUSG00000068011	3	2	2	490	342	581.982	99.974	189	180.176	2	2	2	601.248	366	504	493.178	742.321	604.564
ENSMUSG00000068114	Ccdc134	844.069	0.622283	0.139936	4.44692	8.71097e-06	3.66865e-05		ENSMUSG00000068114	Ccdc134	844.069	-0.67821	0.137728	-4.92428	8.46736e-07	0.000193299		ENSMUSG00000068114	490.404	707.059	635.071	773.248	727.571	763	1247.57	1192	1393.69	412.001	443.001	710.314	789.715	662	687.007	950.014	1239.43	1222.34
ENSMUSG00000068129	Cst7	16.1939	-2.97229	0.695202	-4.27544	1.90762e-05	7.58477e-05		ENSMUSG00000068129	Cst7	16.1939	-2.62686	0.703282	-3.73515	0.000187606	0.0129193		ENSMUSG00000068129	37	20	26	2	4	4	26	22	9	32	20	28	10	9	12	5	6	16
ENSMUSG00000068227	Il2rb	156.795	-2.14385	0.405466	-5.28737	1.24087e-07	7.01877e-07		ENSMUSG00000068227	Il2rb	156.795	-2.36015	0.405815	-5.81583	6.03343e-09	3.59097e-06		ENSMUSG00000068227	170	258	305.87	80	48	29	252.833	242.003	149	215	195	284	72	80	95	60	81	161.961
ENSMUSG00000068246	Apol9b	226.717	1.43402	0.269919	5.31278	1.07966e-07	6.14658e-07		ENSMUSG00000068246	Apol9b	226.717	1.38402	0.270091	5.12425	2.98717e-07	8.73354e-05		ENSMUSG00000068246	123.642	108.509	125.909	249.783	242.491	418.626	102.654	115.827	137.15	82.517	84.539	91.17	334.57	244.259	318.376	361.745	561.995	356.339
ENSMUSG00000068893	Sprr2a2	14269.4	9.61199	0.626708	15.3373	4.30848e-53	6.84045e-51		ENSMUSG00000068893	Sprr2a2	14269.4	2.58332	0.613654	4.20973	2.55671e-05	0.00308751		ENSMUSG00000068893	15.206	82.869	36.696	16507.2	20885.4	52658.9	1325.8	7492.41	6259.94	21.231	54.044	28.544	23825.7	18575.8	19357.9	26418.6	32512.5	28911
ENSMUSG00000069255	Dusp22	470.946	1.28975	0.208823	6.17628	6.56306e-10	4.88766e-09		ENSMUSG00000069255	Dusp22	470.946	0.844639	0.208539	4.05028	5.11573e-05	0.00518352		ENSMUSG00000069255	277.959	419.728	364.075	507.181	616.213	626.107	302.393	431.799	379.302	328.972	368.095	398.471	592.31	639.781	507.163	424.402	501.451	499.15
ENSMUSG00000070419	Cyp3a57	72.745	2.13872	0.51043	4.19003	2.78918e-05	0.000107497		ENSMUSG00000070419	Cyp3a57	72.745	-1.94916	0.461644	-4.22222	2.41903e-05	0.00300844		ENSMUSG00000070419	7	11	23	62	60	35	195.017	104	266.979	34	39	58	31.014	85.992	49	30.049	72.125	100.835
ENSMUSG00000070661	Rnf186	280.959	2.77392	0.456942	6.07062	1.2742e-09	9.19908e-09		ENSMUSG00000070661	Rnf186	280.959	2.00034	0.453136	4.41443	1.01275e-05	0.00156272		ENSMUSG00000070661	98	73	31	292.15	363	606	55	143	116	29	69	46.001	469.076	251	374.251	495	918.389	682.597
ENSMUSG00000072572	Slc39a2	516.136	2.45899	0.262165	9.37954	6.62641e-21	1.45631e-19		ENSMUSG00000072572	Slc39a2	516.136	1.10705	0.257921	4.29219	1.7692e-05	0.00233687		ENSMUSG00000072572	216.274	145	133	760.004	702	954	261	402	417	179	146.001	151	780.867	692.381	717	799	799.555	898.419
ENSMUSG00000072849	Serpina1e	5667.12	2.22956	0.38628	5.77189	7.83892e-09	5.19314e-08		ENSMUSG00000072849	Serpina1e	5667.12	-1.69946	0.385409	-4.4095	1.03611e-05	0.0015697		ENSMUSG00000072849	1243.14	1064.01	538.854	3611.86	3565.53	4845.5	11489.8	10936.1	15612.6	1281.52	1076.92	428.874	2521.89	3101.29	2806.53	7843.62	16030	11904.1
ENSMUSG00000074006	Omp	257.883	5.89956	0.363034	16.2507	2.20752e-59	4.89831e-57		ENSMUSG00000074006	Omp	257.883	1.81658	0.255166	7.1192	1.08557e-12	1.80911e-09		ENSMUSG00000074006	11	8	10	494.567	416.988	665.24	122	145	168.002	6	4	4	506.023	388.848	508.904	338.98	433.999	378.681
ENSMUSG00000074340	Ovgp1	335.394	-0.810787	0.246355	-3.29114	0.000997825	0.00283289		ENSMUSG00000074340	Ovgp1	335.394	-1.38748	0.245202	-5.65852	1.52683e-08	7.06795e-06		ENSMUSG00000074340	357.965	523.153	323.002	203.999	236.001	195	702.39	393	644.006	423.16	375	363.164	194	181	264	165	198	258.252
ENSMUSG00000074625	Arhgap40	139.479	2.33052	0.452438	5.15103	2.59055e-07	1.39749e-06		ENSMUSG00000074625	Arhgap40	139.479	1.60644	0.441638	3.63745	0.000275354	0.0164472		ENSMUSG00000074625	51	44	24	270.937	246	221	42	132	101	23	66	49	256.973	249	201	207	177.823	172.026
ENSMUSG00000076490	Trbc1	39.8484	-2.51256	0.420248	-5.97876	2.24845e-09	1.58234e-08		ENSMUSG00000076490	Trbc1	39.8484	-1.66143	0.430781	-3.85679	0.000114888	0.00898878		ENSMUSG00000076490	115.432	65.046	69.43	12.341	15.317	13.666	41.998	41.769	37.103	61.561	50.873	72.302	21.896	26.159	13.149	17.186	16.344	32.028
ENSMUSG00000078664	Sprr2a1	1701.5	9.1343	0.740209	12.3402	5.50444e-35	3.29141e-33		ENSMUSG00000078664	Sprr2a1	1701.5	2.22426	0.665543	3.34203	0.000831681	0.034824		ENSMUSG00000078664	8.795	1.835	8.299	1837.37	2498.91	4824.68	145.677	1016.78	829.09	1.464	6.618	2.456	2674.34	2232.72	2410.16	3429.59	4151.43	3715.39
ENSMUSG00000078786	BC024978	345.498	-0.563363	0.228822	-2.46201	0.0138162	0.0296928		ENSMUSG00000078786	BC024978	345.498	-0.93762	0.229872	-4.07888	4.52525e-05	0.00474297		ENSMUSG00000078786	406.265	532.86	466.474	264	235.122	252.164	372.001	308.019	377.001	422.999	379.421	496	240.005	247.999	287	258	318	365.007
ENSMUSG00000079339	Ifit1bl1	99.211	2.98722	0.462976	6.4522	1.10235e-10	8.97523e-10		ENSMUSG00000079339	Ifit1bl1	99.211	2.10359	0.445015	4.727	2.27863e-06	0.000431515		ENSMUSG00000079339	18	18	9	137.89	100	85.995	11	34	25.161	18.08	17	14	190	131	169	224	454.442	149
ENSMUSG00000079362	Gm43302	22.6982	7.70261	2.26406	3.40212	0.000668661	0.00197067		ENSMUSG00000079362	Gm43302	22.6982	7.48627	2.26406	3.30657	0.000944471	0.0376944		ENSMUSG00000079362	0	0	0	28.424	50.805	24.779	0	0	0	131.422	20.534	0	0	0	0	53.56	47.376	39.984
ENSMUSG00000079523	Tmsb10	8041.88	1.54256	0.291217	5.29695	1.17752e-07	6.67938e-07		ENSMUSG00000079523	Tmsb10	8041.88	1.03146	0.291165	3.54253	0.000396305	0.0213735		ENSMUSG00000079523	5199.01	4977.6	4289.72	8956.79	9453.24	20181.1	4579.71	6887.99	7093.02	3781.02	3906.6	4675.75	9414.56	9407.63	10042.4	9421.94	11371.3	9608.16
ENSMUSG00000079620	Muc4	12261.9	4.63626	0.255266	18.1625	1.02261e-73	4.59353e-71		ENSMUSG00000079620	Muc4	12261.9	0.997386	0.252567	3.94899	7.84816e-05	0.00685146		ENSMUSG00000079620	389	815.203	380.08	26633	16030.9	7966.25	7860.34	13905.2	11717.1	752.008	668.955	598.311	30640.2	21285.4	25630.8	29326.6	39683.3	34699.6
ENSMUSG00000079852	Klra4	49.7358	-2.5899	0.4431	-5.84497	5.0667e-09	3.41307e-08		ENSMUSG00000079852	Klra4	49.7358	-1.50083	0.454675	-3.30089	0.000963785	0.0378701		ENSMUSG00000079852	117	80	121	23	9	15	40	60	22	104.503	110	82	16	21	20	17	22.069	34
ENSMUSG00000080896	Gm14567	6.36102	-5.23673	1.55386	-3.37014	0.000751292	0.0021876		ENSMUSG00000080896	Gm14567	6.36102	-5.23329	1.55863	-3.35762	0.000786177	0.0333428		ENSMUSG00000080896	6.76	9.709	5.561	0	0	0	7.654	11.25	0	12.409	19.141	10.756	4.085	4.575	6.41	6.496	0	10.085
ENSMUSG00000089789	Rdh1	96.4099	-1.49424	0.354841	-4.211	2.54238e-05	9.88243e-05		ENSMUSG00000089789	Rdh1	96.4099	-1.41931	0.356529	-3.9809	6.86536e-05	0.00628633		ENSMUSG00000089789	81.98	96.376	210.513	51.007	44.632	31.742	96.292	88.279	135.529	162.46	154.007	289.22	41.438	47.036	50.074	40.398	60.835	77.772
ENSMUSG00000090946	Ccdc71l	895.672	0.896992	0.119662	7.49607	6.57592e-14	7.65058e-13		ENSMUSG00000090946	Ccdc71l	895.672	-0.512398	0.116732	-4.38952	1.13602e-05	0.00167538		ENSMUSG00000090946	431.993	611.984	602.008	914	956.985	786	1147.92	1152	1257.25	520.284	604	664.11	938.065	1051.48	1012	889.635	1030.38	1357.86
ENSMUSG00000091243	Vgll3	238.914	0.87921	0.364921	2.40932	0.0159824	0.0337864		ENSMUSG00000091243	Vgll3	238.914	-1.18252	0.35982	-3.28642	0.00101471	0.0389636		ENSMUSG00000091243	98.999	119	153.095	161	265	131	418.055	281.024	421.812	240	123.018	250.884	165	334.875	174.001	222.006	227.001	349.631
ENSMUSG00000091811	Inafm1	468.475	-1.30582	0.260648	-5.0099	5.44577e-07	2.79139e-06		ENSMUSG00000091811	Inafm1	468.475	0.886726	0.26609	3.33242	0.000860933	0.0358686		ENSMUSG00000091811	1058.37	1067.93	928.355	272	321	533	188	190	209.927	506.737	776	905.561	241.579	302.001	243.959	230	282	250.568
ENSMUSG00000091956	C2cd4b	26.802	4.12273	0.699977	5.88981	3.86641e-09	2.64614e-08		ENSMUSG00000091956	C2cd4b	26.802	2.83885	0.639681	4.43792	9.08331e-06	0.00142805		ENSMUSG00000091956	5.003	3	5	54	29.015	125.005	8.016	6	13.013	6	8.885	1	27.029	44	34.001	29	45.006	34.929
ENSMUSG00000092111	Vmn2r113	168.801	3.42246	0.405478	8.44055	3.1584e-17	4.9759e-16		ENSMUSG00000092111	Vmn2r113	168.801	1.58686	0.386588	4.10478	4.04707e-05	0.00435126		ENSMUSG00000092111	40.175	27.455	23.272	213.04	169.576	427.479	65.927	104.778	96.539	34.16	20.276	18.847	277.986	210.15	255.661	283.7	331.29	357.012
ENSMUSG00000095026	Gm3336	73.2864	5.62435	0.612134	9.1881	3.99835e-20	8.20018e-19		ENSMUSG00000095026	Gm3336	73.2864	1.10434	0.297433	3.71291	0.00020489	0.0136035		ENSMUSG00000095026	1	3	3	121.917	93	154	49	66	58	2	5	0	137.001	105	103	127	167.337	156.341
ENSMUSG00000102270	Gm8388	12.1138	-4.38062	0.923335	-4.74435	2.09181e-06	9.77539e-06		ENSMUSG00000102270	Gm8388	12.1138	-3.00245	0.948143	-3.16666	0.00154198	0.0495128		ENSMUSG00000102270	31	28.066	30.992	1	3.003	0	14	3	13	25.995	35	23	1	0	2.002	4	3.003	2.002
ENSMUSG00000108022	Gm7298	54.3765	4.44341	1.19264	3.72568	0.000194789	0.00064499		ENSMUSG00000108022	Gm7298	54.3765	-3.21632	0.943439	-3.40914	0.000651669	0.0298016		ENSMUSG00000108022	1	3.03	0	27	27.174	24.001	203	207.559	267.349	0	24	0	20.01	2	27.001	11.911	29.004	39.004
ENSMUSG00000108931	Olfr1284	112.195	1.66803	0.302837	5.50802	3.62893e-08	2.21598e-07		ENSMUSG00000108931	Olfr1284	112.195	1.13128	0.299563	3.77644	0.000159083	0.0112335		ENSMUSG00000108931	63.246	58.547	61.131	142.487	118.998	247.165	54.654	89.365	79.287	57.912	52.464	75.511	141.975	126.063	133.498	146.008	172.801	178.758
ENSMUSG00000109305	Smim38	27.138	-3.54539	0.561869	-6.30999	2.79047e-10	2.15661e-09		ENSMUSG00000109305	Smim38	27.138	-1.90428	0.587569	-3.24094	0.00119137	0.0426973		ENSMUSG00000109305	62	57	68.881	5	4	6	22	9	19	69	49	78	0	3	3	5	4.008	4.002
ENSMUSG00000109523	Gdf1	24.9319	-3.08323	0.997072	-3.09228	0.00198623	0.00530457		ENSMUSG00000109523	Gdf1	24.9319	5.7464	1.54093	3.72919	0.000192099	0.0131202		ENSMUSG00000109523	68.334	140.28	89.024	7.367	0	21.048	0	0	0	33.536	35.081	78.801	0	0	0	0	0	0
ENSMUSG00000109901	Chmp1b	1333.82	0.766826	0.0962109	7.97027	1.58334e-15	2.12384e-14		ENSMUSG00000109901	Chmp1b	1333.82	0.3073	0.0957584	3.20912	0.00133144	0.0458439		ENSMUSG00000109901	888.829	1070.94	1080.54	1734.74	1440.99	1320	1067.04	1105.04	1293	1074.01	1122.3	1100	1418.82	1637.34	1689.47	1392.05	1742.25	1800.84
ENSMUSG00000113506	Gm49377	44.872	-1.06719	0.331461	-3.21966	0.00128344	0.00356195		ENSMUSG00000113506	Gm49377	44.872	-1.07553	0.336734	-3.19399	0.0014032	0.0470508		ENSMUSG00000113506	44.152	45.125	58.006	21.851	24.993	13.44	37.974	37.115	42.78	62.849	59.377	47.583	33.773	51.063	43.122	64.056	60.774	65.683
ENSMUSG00000117819	Gm50253	284.735	-2.88386	0.279955	-10.3012	6.9619e-25	2.1193e-23		ENSMUSG00000117819	Gm50253	284.735	-0.925552	0.286709	-3.2282	0.00124574	0.0437056		ENSMUSG00000117819	599.807	685.421	588.408	115.501	40.891	79.514	125.649	163.257	132.192	476.404	764.062	693.589	150.558	97.431	96.992	114.118	129.389	171.894
ENSMUSG00000118282	Gm4840	10.7587	-1.90416	0.706789	-2.6941	0.00705799	0.0164624		ENSMUSG00000118282	Gm4840	10.7587	-2.22729	0.703975	-3.16388	0.00155682	0.0498929		ENSMUSG00000118282	10	25	14	4	7	1	25.001	10	17	9	11	6	12	4	11	8	9	10

## Sheet: Sample ID
Sample ID	Genotype and treatment group
RMU047	WT-Ctrl
RMU048	WT-Ctrl
RMU049	WT-Ctrl
RMU053	WT-EB
RMU054	WT-EB
RMU055	WT-EB
RMU059	WT-EBP
RMU060	WT-EBP
RMU061	WT-EBP
RMU050	AF1_FFF-Ctrl
RMU051	AF1_FFF-Ctrl
RMU052	AF1_FFF-Ctrl
RMU056	AF1_FFF-EB
RMU057	AF1_FFF-EB
RMU058	AF1_FFF-EB
RMU062	AF1_FFF-EBP
RMU063	AF1_FFF-EBP
RMU064	AF1_FFF-EBP
